# Supplementary material
Source: PubMed Central journal article supplement (PMC4874846)
Supplement: NIHMS757933-supplement-Supp_Info.pdf [file NIHMS757933-supplement-Supp_Info.pdf]

## **Supporting Information**

### **MATERIALS AND METHODS**

#### **Hydrodynamic injection, vector constructs**

For tumor generation, oncogenic plasmids and sleeping beauty transposase(1) (ratio of 10:1) were diluted in 2mL saline (0.9% NaCl), and injected into the tail vein of 6 - 8 week-old FVB/n female mice (NCI-Frederick, USA) in 5 - 7 seconds. For AKT-CAT tumors, plasmids encoding for activated AKT1 (myristoylated-AKT1) and b-catenin (truncated D90N-b-catenin) were used(2). For AKT-NRAS<sup>G12V</sup> tumors, AKT1 and N-Ras<sup>G12V</sup> plasmids were used(3). For chronic liver inflammation, mice received a diet containing 0.1% DDC (Bio-Serv, Flemington, NJ) or were treated intraperitoneally twice a week with carbon tetrachloride (CCl<sub>4</sub>; Sigma) diluted 1:10 in mineral oil (Sigma) at 5ml/g body weight. Mice were kept in accordance with the animal regulations at the NCI/NIH (Bethesda, USA).

#### **Statistics**

Data were analyzed using Student t test. P values < 0.05 were considered as significant.

**Cell lines and DDC treatment.** SNU-449 and PLC/PLR/5 were obtained from ATCC (Manassas, VA, USA). Media were supplemented with 10% heat-inactivated fetal bovine serum (FBS) 10%, 2mM Glutamine and 100 U/mL penicillin/streptomycin. Cell proliferation was assessed using the xCELLigence system (ACEA, Basel, Switzerland). 5000 cells/well were plated and DDC (Sigma, Switzerland) at different concentration was added to the wells. Cell proliferation was monitored with a 15 min frequency measured in real time starting 48h after start of DDC treatment until cell growth reached a plateau due to confluence. Proliferation rate was calculated as relative cell index and time 0 was considered as the time of DDC addition to the media.

**Immunoblotting.** Three tumors of each group (AKT-CAT, AKT-CAT+DDC, and AKT-CAT+CCl<sub>4</sub>) and untreated liver control tissue were used. Tumor specimens were homogenized in RIPA buffer [30 mM Tris (pH 7.5), 150 mM NaCl, 1% NP-40, 0.5%

Na deoxycholate, 0.1% SDS, 10% glycerol, and 2 mM EDTA] containing the Complete Protease Inhibitor Cocktail (Roche Molecular Biochemicals, Indianapolis, IN). The concentration of protein contained in the supernatants was assessed by employing the BCA assay method.

Subsequently, 60 µg of protein lysates for each sample were used to run SDS-PAGE by using gradient polyacrylamide gels (Life Technologies, Thermo Fischer Scientific, Waltham, MA, USA). Proteins were electro-blotted on nitrocellulose filters by using a semi-dry apparatus (Life Technologies, Thermo Fischer Scientific). Finally, after blocking in a solution containing 5% non-fat milk, filters were incubated overnight at 4 °C with AceCS1, ACSL1, Phospho-ATP-Citrate Lyase, Fatty Acid Synthase, phospho PS6 (Cell Signalling, USA) and b-Actin (Sigma Aldrich, USA) antibodies. After incubation and several washings in a solution of Tween-TBS, filters were incubated with secondary antibodies conjugated to the horseradish peroxidase for one hour at room temperature. Signals were finally detected by using Enhanced Chemiluminescent Kit (GE Healthcare, Buckinghamshire, United Kingdom) and signal was acquired with Azura C300 apparatus (Axon Lab AG, Switzerland).

### **Histology, Immunohistochemistry, Immunofluorescence**

Individual liver tumors ( $\geq 2$ mm in diameter) were macrodissected in half. One half was flash frozen and used for RNA or DNA isolation; the other half was used for histology and stained for H&E or Sirius red. Immunohistochemistry was performed on an entire tumor section or on a TMA, which was constructed after selecting a representative tumor area on an H&E-stained slide of the donor paraffin block. Afterwards, a core punch with a diameter of 0.6 mm was taken from the tumor. Core punches were transferred to a new paraffin recipient block by using a programmed tissue arrayer (Beecher Instruments, Silver Spring, MD, USA). TMAs were cut in sections of 4 mm thickness, deparaffinized and stained according to standard protocols using polyclonal antibodies against pAKT(Ser473), b-catenin (D10A8), CD31, CD3, Ly6.G (all Cell Signaling Technologies).

For visualization of GFP encoding plasmid, livers were perfused *in situ* with 4% paraformaldehyde and post fixed in the same fixative for 4 hours. Fixed tissue fragments were incubated in 30% sucrose overnight at 4°C and embedded in Tissue-Tec OCT (Fisher; Pittsburgh, PA). Five-µM frozen sections were prepared and examined with an immunofluorescence microscope.

### **Transposon replication assay**

A total of 4µg DNA was subjected to DpnI (10 units) digestion overnight at 37° C. Quantitative PCR was performed using SYBR Green (Applied Biosystems, Foster City, CA) with the following primers: pT3-AKT-FW GTGGGTGGAGACTGAAGTTAG and pT3-AKT-RW GAATTCCACCACACTGGACTA.

### **Cholesteryl and triglyceride measurement**

Cholesteryl-ester, free cholesterol, and triglyceride levels were determined using the Cholesterol/Cholesteryl Ester Quantification or Triglyceride Quantification assay Kit (Abcam, Cambridge, MA) according to the instructions.

### **Microarray data analysis**

Microarray analysis was performed from four mice per group and three mice per non-tumoral and control group. RNA was isolated from fresh frozen tissue using RNeasy kit from Qiagen (Valencia, CA, USA) and pooled from 3-4 histologically confirmed hepatocellular tumors per mouse and 1-2 locations of non-tumoral tissue and control liver tissue of age- and sex-matched mice on normal chow. RNA hybridized on Sentrix Mouse Ref-8v2.0 expression BeadChips (Illumina, San Diego, CA) and scanned on an iSCAN (Illumina). Data preprocessing and quantile normalization with background subtraction was performed with GenomeStudio2010 (Illumina). Signal intensity with a detection  $p > 0.05$  was treated as missing value, and only genes represented in at least 50% of all samples were included. Data analysis was performed with Qlucore (Lund, Sweden). Functional analyses were performed by GSEA and Ingenuity Pathway Analysis (IPA8.7; Ingenuity Systems, Redwood City CA). All microarray data was submitted to GEO (*accession number pending*). If not stated otherwise, significantly different expressed genes between two groups were identified using a p-value of 0.001 and fold change difference of 1.5.

### **RNA extraction and qRT-PCR analysis**

RNA was isolated from fresh frozen tissue using RNeasy kit from Qiagen (Valencia, CA, USA) according to the manufacturer's instructions. Complementary DNA was generated starting from 1 µg of RNA retrotranscribed with First-Strand cDNA Synthesis Kit (GE Healthcare, Little Chalfont, United Kingdom). qRT-PCR analyses

were performed in 384-well plates using ViiA™ 7 Real-Time PCR System (Life Technologies, Thermo Fischer Scientific, Waltham MA, USA). GAPDH expression was used as internal control and relative expression levels were calculated by applying the  $2^{-\Delta Ct}$  formula. Primer sequences are as follows:

**CXCL16:** CXCL16 Left 5'-CGTTGTCCATTCTTTATCAGGTTCC-3', CXCL16 Right: 5'-TTGCGCTCAAAGCAGTCC-3';

**Nedd9:** Nedd9 Left 5'-GACGACGCCAAACAACACTGACCAC-3', Nedd9 Right: 5'-GGCTTACTGTGGACCTGGGCTTT-3';

**Gal3:** Gal3 Left 5'-AGGTTCTTCATCCGATGGTTGT-3', Gal3 Right 5'-AGGTTCTTCATCCGATGGTTGT-3';

**GAPDH:** GAPDH Left 5'-CATGGCCTCCAAGGAGTAAG-3', GAPDH Right 5'-TGTGAGGGAGATGCTCAGTG-3'

## REFERENCES

1. Yant SR, Park J, Huang Y, Mikkelsen JG, Kay MA. Mutational analysis of the N-terminal DNA-binding domain of sleeping beauty transposase: critical residues for DNA binding and hyperactivity in mammalian cells. *Mol Cell Biol* 2004;24:9239-9247.
2. Stauffer JK, Scarzello AJ, Andersen JB, De Kluver RL, Back TC, Weiss JM, Thorgeirsson SS, et al. Coactivation of AKT and beta-catenin in mice rapidly induces formation of lipogenic liver tumors. *Cancer Res* 2011;71:2718-2727.
3. Ho C, Wang C, Mattu S, Destefanis G, Ladu S, Delogu S, Armbruster J, et al. AKT (v-akt murine thymoma viral oncogene homolog 1) and N-Ras (neuroblastoma ras viral oncogene homolog) coactivation in the mouse liver promotes rapid carcinogenesis by way of mTOR (mammalian target of rapamycin complex 1), FOXM1 (forkhead box M1)/SKP2, and c-Myc pathways. *Hepatology* 2012;55:833-845.

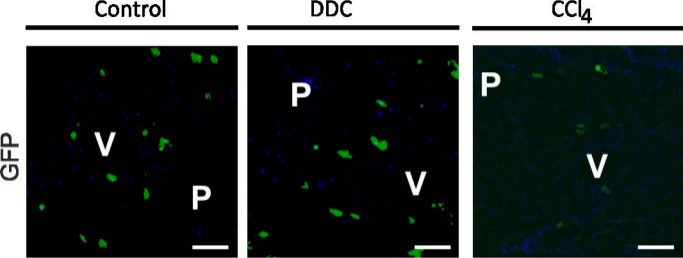

Supplementary Figure 1. Confocal immunofluorescence microscopy of liver tissue from FVB/n mice, 7 days after hydrodynamic injection with a GFP-labelled plasmid and 4 days after start with DDC diet or CCl<sub>4</sub> administration. Bar=100 $\mu$ m. P: portal tract; C: central vein, blue: DAPI. One representative picture from 3 mice/group.

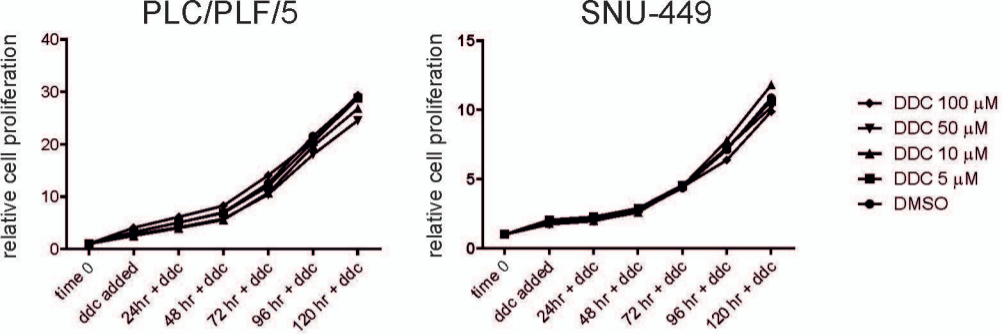

Supplementary Fig. 2. Liver cancer cell lines SNU-449 and PLC/PLF/5 were treated with different concentrations of DDC and proliferation rate was measured using Xcelligence.

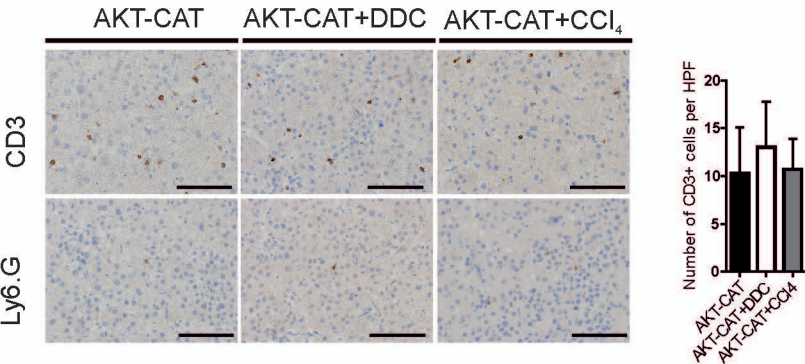

Supplementary Figure 3. Immunohistochemical analysis of intratumoral CD3+ and Ly6.G+ cells. Bar=50 $\mu$ m. One representative picture from 3-7 mice/group.

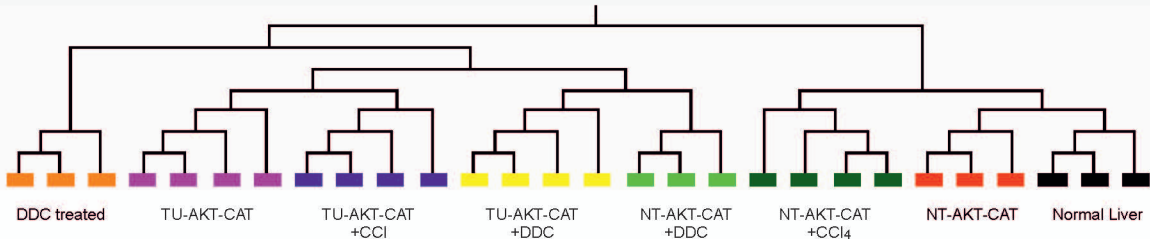

Supplementary Fig. 4. Unsupervised clustering (average linkage) of all samples analyzed (detected gene number n=9037).



relative expression 2-dCt

CXCL16

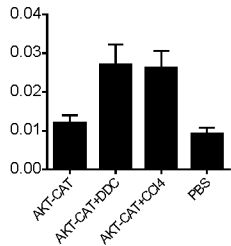

Galectin-3

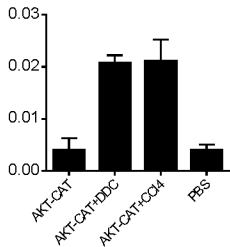

Nedd9

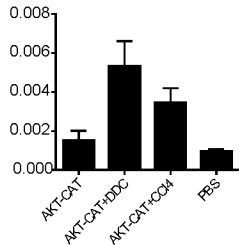

Supplementary Figure 5. Expression of CXCL-16, Galectin-3, and Nedd9 was evaluated by qRT-PCR in a panel of randomly selected AKT-CAT, AKT-CAT+DDC, and AKT-CAT+CCl4 tumors as well as normal liver (PBS). GAPDH was used as internal control and 2-dCt formula was applied to determine relative expression levels. Data represented as mean $\pm$  SEM.

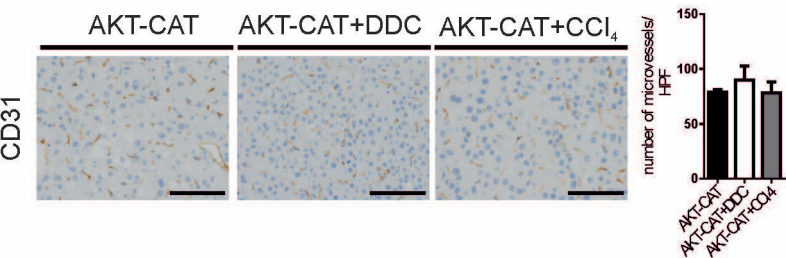

Supplementary Figure 6. Immunohistochemical analysis of CD31+ microvessels. Bar=50 $\mu$ m.

One representative picture from 4-7 mice/group.

**A**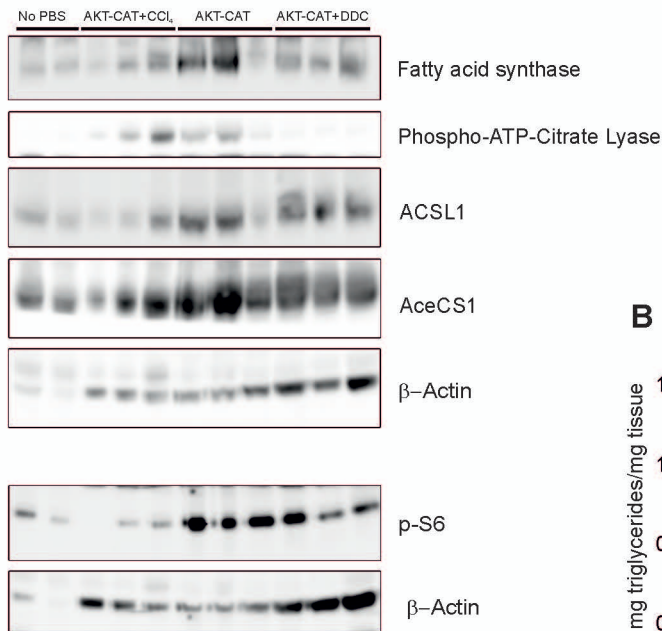**B**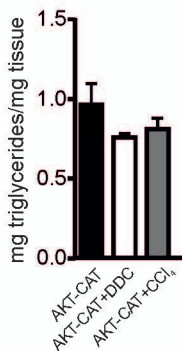

Supplementary Figure 7. A) AKT-CAT, AKT-CAT+DDC, AKT-CAT+CCl<sub>4</sub> tumors and normal liver (PBS) were measured for expression of several proteins by western blot.

B) Triglycerides were measured in AKT-CAT, AKT-CAT+DDC, and AKT-CAT+CCl<sub>4</sub> tumors.

A

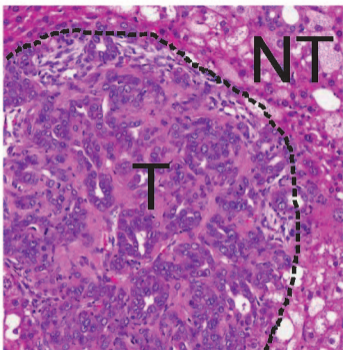

B

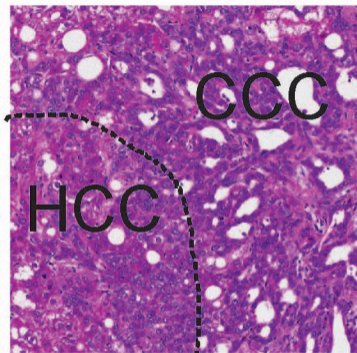

Supplementary Figure 8. AKT-NRAS tumors showing a CCC (A), and a mixed HCC-CCC (B).

**A**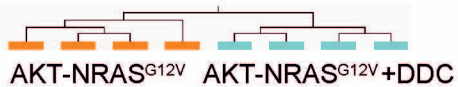**B**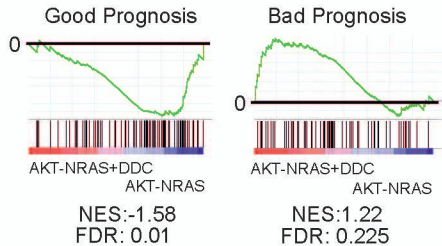

Supplementary Figure 9. (A) Unsupervised hierarchical clustering of transcriptome from AKT-NRAS<sup>G12V</sup> and AKT-NRAS<sup>G12V</sup> + DDC tumors. (B) GSEA using good and bad prognosis gene sets as described before.

**Supplementary Table 1**

Genes differently expressed in AKT-CAT tumors in comparison to normal liver tissue ( $p < 0.001$ , fold change  $> 1.5$ )

| Gene_Symbol   | p-value    | Fold change |
|---------------|------------|-------------|
| A530050D06Rik | 0.0001467  | -11.2071    |
| A730098D12Rik | 0.00078798 | -1.77633    |
| AA407659      | 0.00030683 | 2.28304769  |
| AI317395      | 2.31E-05   | -2.28756    |
| Abat          | 0.00063657 | -2.8655     |
| Abca6         | 0.00035737 | -2.1021     |
| Abcg5         | 0.00074825 | -2.00181    |
| Acot10        | 0.00075927 | 3.88039083  |
| Actn3         | 0.00055552 | -1.75191    |
| Adam9         | 0.00014995 | 2.01617781  |
| Adamtsl4      | 0.00089511 | 1.99240098  |
| Adra1b        | 0.00075801 | -3.69244    |
| Afmid         | 0.00032711 | -3.66423    |
| Aifm1         | 0.00055673 | 1.87377853  |
| Akr1b8        | 0.00062292 | -3.37421    |
| Aldh1l1       | 9.75E-05   | -2.62692    |
| Anapc2        | 0.00033067 | 1.55470703  |
| Anxa2         | 1.30E-06   | 12.545981   |
| Anxa5         | 4.28E-05   | 12.9250901  |
| Aplp2         | 0.00039729 | 2.3369837   |
| Arf14         | 0.00016035 | -5.29923    |
| Arhgap17      | 0.00046287 | 2.16482548  |
| Arhgef19      | 0.00040546 | 2.64802457  |
| Arl2bp        | 0.00075886 | 3.93318309  |
| Arl6ip1       | 0.00068352 | 1.86724975  |
| Arl8a         | 1.54E-05   | 4.3052787   |
| Arpc5         | 0.00017492 | 1.57620312  |
| Arpp19        | 3.16E-06   | 2.96644359  |
| Arrdc2        | 0.00086608 | -6.95873    |
| Arsa          | 0.00024664 | 4.47499374  |
| Art5          | 0.00091861 | -1.98838    |
| Asb13         | 1.85E-05   | 1.64372573  |
| Ass1          | 0.00075706 | -4.59167    |
| Atp5sl        | 0.00042812 | -3.33921    |
| Atp6ap2       | 8.81E-05   | 1.50982367  |
| Atp6v1a       | 0.00047124 | 1.73561393  |
| B230339M05Rik | 0.0004623  | 1.76858116  |
| B230342M21Rik | 0.00024275 | -4.2556     |
| BC046331      | 0.00013105 | 1.78627569  |
| BC057552      | 0.00055546 | 3.46757471  |
| Bat4          | 0.00094131 | -1.786      |
| Bcas2         | 0.00086032 | 1.84687214  |
| C6            | 0.00040933 | 3.56746614  |

|          |            |            |
|----------|------------|------------|
| Cacna2d1 | 0.00011862 | -1.50538   |
| Cc2d1a   | 9.51E-05   | 2.23470678 |
| Cd164    | 5.89E-06   | 1.94154399 |
| Cd81     | 0.00029425 | 1.79388286 |
| Cdc42se1 | 7.59E-06   | 3.48869662 |
| Cdca3    | 0.0004697  | 9.92358837 |
| Chaf1b   | 0.00056795 | 2.08374574 |
| Chchd7   | 0.00059231 | -2.5457    |
| Clec2d   | 0.00065366 | -2.76112   |
| Cln3     | 0.00051038 | 1.84748631 |
| Cmtm8    | 0.00085862 | -2.43945   |
| Col4a1   | 0.00072544 | 5.68734395 |
| Coro1c   | 4.67E-05   | 2.24234352 |
| Cpsf4    | 0.00080621 | -2.76318   |
| Cpsf4l   | 8.58E-05   | -7.88538   |
| Cs       | 0.00026994 | 3.12548836 |
| Ctnna1   | 0.00030325 | 1.60245368 |
| Ctnnal1  | 0.00084617 | 2.59525225 |
| Ctsb     | 0.00016576 | 1.61413987 |
| Cyp2d9   | 6.14E-05   | 18.2602709 |
| Cyp4b1   | 0.00033447 | -6.05147   |
| Cyp4f15  | 0.00034366 | -3.27699   |
| Dab2ip   | 7.11E-05   | 3.47765606 |
| Dbnidd2  | 1.76E-05   | 3.65203418 |
| Dbt      | 0.00021108 | -2.31158   |
| Dcxr     | 0.00040588 | -3.43194   |
| Ddt      | 0.0001438  | -2.05594   |
| Ddx3x    | 0.00052266 | 1.53746101 |
| Degs1    | 0.0002986  | 1.58071777 |
| Dgcr6    | 7.66E-05   | -2.06081   |
| Dhx32    | 2.78E-05   | 1.8437224  |
| Dpp7     | 0.00028918 | 2.38137763 |
| Dscr1l2  | 6.91E-05   | 3.46416323 |
| Dync1i2  | 7.88E-05   | 1.80625397 |
| EG317677 | 0.00050143 | -3.09292   |
| Edg8     | 0.00076931 | -2.01095   |
| Efha1    | 0.00083733 | 2.42411314 |
| Egln2    | 9.40E-05   | -2.49171   |
| Egln3    | 0.00083032 | 6.00488798 |
| Ehd4     | 0.00044775 | 2.82194116 |
| Eif2ak2  | 0.00026146 | 2.46236885 |
| Elf3     | 0.00037378 | 3.49606343 |
| Elmo1    | 2.98E-05   | 3.52322333 |
| Emp1     | 0.00052741 | 7.66430351 |
| Emp2     | 0.00078179 | 3.79572905 |
| Endod1   | 1.59E-05   | 8.51317414 |
| Ercc3    | 0.00025084 | 2.13541066 |
| Erh      | 0.00040768 | 1.8347109  |
| Ermp1    | 0.00011604 | 2.74704144 |

|           |            |            |
|-----------|------------|------------|
| Es22      | 0.00052835 | -4.33985   |
| Espn      | 0.00072195 | 12.329468  |
| Ets2      | 0.00029494 | 3.27046411 |
| F2r       | 0.00016945 | 2.99224709 |
| Fahd2a    | 0.0002186  | -1.95798   |
| Fam102a   | 0.00026582 | 2.0349482  |
| Fam164a   | 0.00049495 | 5.05379768 |
| Fbxo4     | 2.89E-05   | 1.86930563 |
| Fbxo6     | 0.00090882 | 2.94159175 |
| Fez2      | 0.00044826 | 1.50631447 |
| Fkbp1a    | 0.00062218 | 2.9793738  |
| Fkbp8     | 0.00050552 | -2.4022    |
| Fnbp1l    | 4.21E-05   | 2.44920352 |
| Fntb      | 0.00050053 | 2.00650509 |
| Foxa1     | 0.00036771 | 2.35101611 |
| Galnt10   | 0.00016936 | 3.6608313  |
| Gars      | 0.00056286 | 2.78483269 |
| Gas6      | 0.00012836 | 4.26852433 |
| Gchfr     | 0.0001919  | -2.48064   |
| Gde1      | 0.00061153 | -2.08708   |
| Gfer      | 2.08E-05   | 1.71053037 |
| Ghdc      | 0.00033654 | -2.16081   |
| Glr2      | 0.00084817 | -2.05124   |
| Gls2      | 0.00060933 | -6.62361   |
| Gm129     | 0.00025626 | -5.2766    |
| Golm1     | 0.00024623 | 8.74860022 |
| Gpt1      | 0.00039924 | -2.34149   |
| Gpx4      | 0.00070411 | 1.90334074 |
| Grcc10    | 0.00082674 | -2.23548   |
| Gspt2     | 0.00045055 | 5.1129711  |
| Gstm1     | 0.00028571 | 2.00281596 |
| Gtpbp2    | 1.20E-05   | 2.11645139 |
| Gypc      | 0.00060642 | -3.11474   |
| H2-M3     | 0.00017366 | -1.65073   |
| Hdgfrp2   | 0.00059353 | 1.87511719 |
| Hint3     | 0.00015509 | -2.08559   |
| Hist1h1c  | 0.00027456 | 4.43606521 |
| Hist1h2bc | 2.86E-06   | 1.81373323 |
| Hist1h4m  | 0.00098145 | 3.9529754  |
| Hn1       | 0.0001511  | 10.5393291 |
| Hn1l      | 0.00062367 | 2.62390747 |
| Homez     | 0.00025499 | -2.7938    |
| Hpgd      | 0.00080484 | -2.54824   |
| Hspbap1   | 0.00021366 | 4.91067482 |
| lah1      | 0.00081951 | -2.05984   |
| ldh2      | 0.00035443 | 2.90794888 |
| lfit2     | 0.00022972 | 9.5848789  |
| lft172    | 0.00014308 | -1.59543   |
| ll18bp    | 0.0006608  | -2.16123   |



|              |            |            |
|--------------|------------|------------|
| Il20ra       | 0.00043313 | -2.14544   |
| Inhbe        | 0.00058909 | 3.55021603 |
| Inpp5f       | 0.00039439 | 1.59902012 |
| Ivd          | 0.00041384 | -2.25625   |
| Jun          | 0.00052315 | 3.45889108 |
| Kif22        | 0.00026542 | 8.23920047 |
| Kif3a        | 0.00019683 | 1.91408074 |
| Klf1         | 0.0002063  | -5.7912    |
| Klf6         | 0.00067604 | 4.95547506 |
| Klhdc8b      | 1.72E-05   | -2.83274   |
| Klk1b4       | 0.000257   | 11.8059991 |
| Kpnb1        | 2.94E-05   | 3.55792118 |
| LOC100040592 | 3.29E-05   | 1.96481797 |
| LOC100044221 | 0.00015242 | 3.80113958 |
| LOC100044298 | 0.00089635 | -2.677     |
| LOC100047490 | 0.00025812 | 1.87185995 |
| LOC100047911 | 0.00036668 | 2.10228013 |
| LOC100048295 | 1.50E-05   | -1.70232   |
| LOC100048331 | 0.00089861 | 1.95324326 |
| LOC100048622 | 0.00093017 | 1.81298021 |
| LOC677317    | 0.000291   | 2.94228415 |
| Lasp1        | 1.41E-06   | 3.56515136 |
| Lgals1       | 0.00016822 | 7.14045999 |
| Litaf        | 0.00016973 | 2.69545412 |
| Lmo4         | 0.0003154  | 1.64497764 |
| Lrp10        | 0.00028999 | 2.25077708 |
| Ly6c1        | 0.00066315 | 3.40210114 |
| Lym5         | 0.00019718 | -2.34135   |
| M6prbp1      | 0.00043317 | 2.43025768 |
| MacroD1      | 0.0008634  | -5.71388   |
| Mad2l1bp     | 0.00014556 | 1.9223856  |
| Magee1       | 0.00084982 | 1.92124804 |
| Mark2        | 0.00059788 | 2.37501484 |
| Mast2        | 2.18E-05   | 4.89339734 |
| Mcl1         | 0.00055409 | 1.64793514 |
| Mcoln1       | 0.00054269 | -2.04155   |
| Mdfic        | 0.00031086 | 4.83210839 |
| Mea1         | 0.00062408 | -1.90899   |
| Mgmt         | 0.00035257 | -2.49704   |
| Mif          | 0.00025842 | 1.74717656 |
| Mpv17l       | 0.00025873 | -3.02653   |
| Mrpl38       | 5.65E-05   | 1.78625335 |
| Mtap7d1      | 0.00042832 | 2.31502381 |
| Mtdh         | 0.00086878 | 1.55260216 |
| Mthfd1       | 7.01E-05   | -2.49556   |
| Mylc2b       | 0.00029093 | 1.97769555 |
| Myo5b        | 2.71E-05   | 4.54977683 |
| Myo9b        | 0.00011479 | 2.96800197 |
| Nans         | 0.00049712 | 2.3778442  |

|          |            |            |
|----------|------------|------------|
| Ndufb7   | 4.11E-05   | -1.83585   |
| Nfkbia   | 0.00012675 | -2.63213   |
| Ngef     | 0.00071526 | -3.83174   |
| Nid1     | 0.00011364 | 4.97136494 |
| Nme3     | 0.00020179 | -2.11392   |
| Nr1i3    | 0.00074835 | -4.72779   |
| Nras     | 0.00011143 | 2.09323258 |
| Ociad2   | 0.00097757 | 3.68735642 |
| Olfm1    | 7.98E-05   | -4.10583   |
| Olfr1443 | 0.00054228 | -2.02909   |
| Olfr244  | 6.28E-05   | -1.98993   |
| Olfr497  | 0.00032311 | -1.62597   |
| Os9      | 0.00047179 | -2.06542   |
| Otc      | 0.00061788 | -2.32973   |
| Pacs2    | 0.00032883 | 2.13049722 |
| Pak4     | 0.00055586 | 2.03751472 |
| Pdlim7   | 5.30E-05   | 5.18672199 |
| Pemt     | 6.99E-05   | -2.0265    |
| Pgp      | 0.00017031 | 2.49156605 |
| Pgs1     | 0.00062592 | 2.32596545 |
| Pi4ka    | 0.00098784 | -1.88642   |
| Pigyl    | 0.00089176 | -2.73746   |
| Pkp2     | 0.00040667 | 2.65428003 |
| Plekha1  | 2.08E-05   | 3.6234641  |
| Plrg1    | 0.00087433 | 1.5088623  |
| Polr2g   | 0.00095113 | 2.3264687  |
| Ppm1k    | 0.00058217 | -3.49575   |
| Ppp2ca   | 0.00033168 | 2.09910725 |
| Ppp2cz   | 2.08E-05   | -1.98615   |
| Prei4    | 0.00022162 | -2.96243   |
| Prkx     | 4.48E-05   | 2.41563398 |
| Prmt2    | 0.00052901 | 5.24535131 |
| Proz     | 0.00046383 | -1.72764   |
| Prss8    | 0.00013548 | 14.0677842 |
| Psm5     | 0.00052269 | 1.60501535 |
| Pxmp2    | 1.64E-06   | -2.99779   |
| Pygb     | 0.00071085 | 4.41358856 |
| Rab2a    | 0.00077981 | 1.51983999 |
| Rab6     | 0.00040302 | 2.09457421 |
| Rassf1   | 0.0008353  | 2.38605399 |
| Rbx1     | 0.00037084 | 1.55087089 |
| Rcan3    | 0.00013596 | 3.76151965 |
| Reep5    | 0.00051668 | 1.86927418 |
| Rela     | 0.00056692 | 1.61927586 |
| Rell1    | 0.00040698 | 3.2013625  |
| Rin3     | 0.00062791 | 2.39653557 |
| Rit1     | 6.62E-06   | 2.11361974 |
| Rpl22    | 4.69E-05   | -2.2148    |
| Rpn2     | 0.00020654 | 1.55783623 |

|           |            |            |
|-----------|------------|------------|
| Rps6ka1   | 0.00047241 | 2.26061756 |
| Rras      | 0.00030352 | 2.1044391  |
| S100a11   | 9.58E-06   | 20.1896209 |
| Samd9l    | 5.14E-06   | 3.28038787 |
| Sardh     | 8.54E-05   | -6.8931    |
| Scamp5    | 5.67E-06   | 8.47127391 |
| Scnn1a    | 5.10E-05   | -11.354    |
| Sdpr      | 0.00082162 | -2.27242   |
| Sec16b    | 0.00077491 | -1.58962   |
| Selk      | 0.00070824 | 2.44723756 |
| Sema3b    | 0.00014412 | -2.12769   |
| Serpina3m | 3.55E-05   | -5.62556   |
| Setdb2    | 0.00095995 | -2.55889   |
| Sfrs4     | 8.51E-05   | -1.90947   |
| Sipa1l1   | 0.00057032 | 2.43975036 |
| Slc24a3   | 0.00031909 | 6.33850132 |
| Slc25a38  | 0.00076283 | -2.21953   |
| Slc27a1   | 0.00048481 | -3.65496   |
| Slc27a5   | 0.00073793 | -2.20446   |
| Slc35a5   | 4.55E-05   | -2.07827   |
| Smox      | 0.00095584 | 2.54443215 |
| Sntg2     | 0.0002276  | -3.40503   |
| Snurf     | 0.00020793 | 3.17505675 |
| Snx7      | 0.00073005 | 3.82706269 |
| Spata2L   | 0.00067134 | -5.54556   |
| Spns1     | 0.00078088 | -1.53399   |
| Spon2     | 0.00027226 | 27.2268871 |
| Srrm2     | 0.00031753 | -1.8627    |
| Taf13     | 0.00045924 | 1.78259157 |
| Tax1bp3   | 1.83E-05   | 3.86097405 |
| Tcn2      | 0.00095325 | -2.0379    |
| Tctex1d2  | 0.00079511 | 2.04010437 |
| Tjp2      | 0.00063412 | 3.07890305 |
| Tjp3      | 0.00011915 | 9.8284928  |
| Tk1       | 3.60E-05   | -5.25065   |
| Tmem176b  | 4.32E-05   | 3.86746955 |
| Tmem183a  | 0.00049853 | -1.97546   |
| Tmem184a  | 0.00096728 | 3.82185566 |
| Tmem43    | 4.79E-05   | 5.03101621 |
| Tmem51    | 0.00078902 | 2.24571237 |
| Tmem63a   | 0.00066592 | -3.87228   |
| Tmem65    | 0.0001378  | 2.15253278 |
| Tnfaip1   | 0.00071858 | 2.41895883 |
| Tnfaip2   | 0.00056619 | 5.22258664 |
| Tnfrsf12a | 0.00015617 | 8.03148341 |
| Tnxb      | 0.00021388 | -3.42594   |
| Tpd52l2   | 0.00031028 | 1.51853832 |
| Tpr       | 0.00034382 | 1.92621814 |
| Tprkb     | 0.00032401 | -1.68397   |

|                |            |            |
|----------------|------------|------------|
| Tpst1          | 0.00070913 | -3.33604   |
| Tpst2          | 0.00077105 | -1.85241   |
| Trak1          | 0.0001498  | -2.28932   |
| Trappc6a       | 3.82E-05   | -1.85138   |
| Trmu           | 0.00026078 | -1.71091   |
| Ttc39a         | 0.00010749 | 3.53222092 |
| Ttyh2          | 0.00047935 | 1.62675425 |
| Tubb2b         | 2.15E-05   | 11.4957328 |
| Tubb6          | 0.00041668 | 4.81065271 |
| Uaca           | 0.00046498 | 1.96675399 |
| Uap1l1         | 3.86E-05   | 5.3922018  |
| Ube2d2         | 0.0008843  | 1.70023786 |
| Ugt2b34        | 0.00022674 | 1.69088007 |
| Unc13b         | 5.85E-06   | 8.43063693 |
| Usp20          | 0.00026062 | 4.64136196 |
| Vcl            | 0.00015528 | 2.53495706 |
| Vkorc1         | 0.00040137 | -1.81984   |
| Wasl           | 0.00098401 | 1.57243088 |
| Xpnpep1        | 0.00064862 | 1.97496924 |
| Yif1b          | 2.58E-05   | -1.69538   |
| Ywhah          | 0.00067309 | 2.34969031 |
| Zbtb33         | 0.00019816 | 2.13616789 |
| Zdhhc14        | 0.00082726 | -2.68867   |
| Zfand2a        | 0.00085748 | 1.90044699 |
| Zfp161         | 0.00022491 | -1.64273   |
| Zfp213         | 0.00064868 | -1.83157   |
| Zfp238         | 0.00015371 | 2.94320209 |
| Zfp36          | 1.15E-05   | -2.70242   |
| Zfp41          | 8.54E-05   | 3.79757411 |
| Zfp715         | 1.93E-05   | -2.08469   |
| Zkscan14       | 0.00024398 | -2.07696   |
| Zmym3          | 0.00025687 | 1.86317235 |
| 0610012D14Rik  | 0.00090552 | -3.7858    |
| 1190003J15Rik  | 5.14E-05   | -1.63114   |
| 1700029P11Rik  | 8.72E-05   | -1.73657   |
| 1700047I17Rik1 | 0.00040948 | 3.37676985 |
| 1810049H13Rik  | 0.00099431 | -2.50287   |
| 2010106G01Rik  | 0.00071534 | 2.05767668 |
| 2310045A20Rik  | 0.00060292 | 3.73329351 |
| 2810004N23Rik  | 7.63E-05   | -2.03563   |
| 4933426M11Rik  | 0.00018288 | -1.73781   |
| 5730502D15Rik  | 0.00085705 | -2.01222   |
| 5930434B04Rik  | 2.82E-05   | -2.36581   |
| 6330503K22Rik  | 7.92E-05   | -1.83809   |
| 8430410K20Rik  | 0.00087695 | 1.69556762 |
| 9130005N14Rik  | 3.73E-05   | 3.19469425 |
| 9530008L14Rik  | 6.20E-05   | -4.84501   |

**Supplementary Table 2**

Genes differently expressed in AKT-CAT+DDC tumors in comparison to normal PBS treated liver tissue ( $p < 0.001$ , fold change  $> 1.5$ )

| <b>Gen_Symbol</b> | <b>p-value</b> | <b>Fold change</b> |
|-------------------|----------------|--------------------|
| A1bg              | 1.49E-06       | -46.6299           |
| A230050P20Rik     | 5.10E-04       | 2.01282573         |
| A530050D06Rik     | 1.66E-06       | -7.3574            |
| AI316807          | 5.01E-04       | -1.90517           |
| AI317395          | 1.17E-04       | -4.21205           |
| AI467606          | 5.29E-04       | -1.74403           |
| AI595366          | 6.75E-05       | 3.24096581         |
| AU040320          | 3.62E-04       | 1.97317274         |
| AW146242          | 3.99E-04       | 3.51790614         |
| Aadat             | 4.17E-04       | -3.7298            |
| Aass              | 3.27E-04       | -5.83774           |
| Abat              | 7.71E-05       | -3.08927           |
| Abcc6             | 5.78E-04       | -3.42502           |
| Abcg8             | 9.65E-04       | -9.16427           |
| Acad10            | 3.35E-04       | -2.06148           |
| Acat1             | 2.76E-04       | -4.70545           |
| Acat2             | 2.63E-06       | 2.33635034         |
| Acot10            | 1.60E-05       | 4.61591012         |
| Actn3             | 6.75E-05       | -1.78481           |
| Acvr2b            | 4.62E-04       | -2.1785            |
| Acy1              | 8.58E-05       | -3.3611            |
| Afmid             | 1.08E-04       | -10.051            |
| Agps              | 4.88E-04       | 2.17484444         |
| Agrn              | 8.32E-04       | 2.61552787         |
| Agxt2l1           | 4.56E-04       | -12.3078           |
| Ahcy              | 2.80E-04       | -4.08223           |
| Ahnak             | 6.03E-05       | 2.87416613         |
| Akr1a4            | 2.63E-04       | 1.83138444         |
| Akr1b8            | 3.44E-05       | -4.95084           |
| Aldh1l1           | 8.36E-05       | -2.8896            |
| Aldh3a2           | 1.75E-04       | 2.25259217         |
| Amd2              | 1.14E-04       | -2.05899           |
| Amn               | 1.44E-04       | 6.55883935         |
| Amt               | 8.94E-04       | -1.77271           |
| Ank               | 1.32E-04       | -8.16363           |
| Ank3              | 3.65E-04       | 3.12829449         |
| Anks1             | 6.11E-04       | -2.55589           |
| Ano10             | 5.37E-04       | 2.61070703         |
| Anxa2             | 1.42E-06       | 11.2908744         |
| Anxa5             | 3.92E-06       | 21.1627671         |
| Aof2              | 2.42E-04       | 1.93970994         |
| Apcs              | 5.08E-05       | -4.50238           |
| Apom              | 4.15E-04       | -9.48833           |

|               |          |            |
|---------------|----------|------------|
| Appbp1        | 3.63E-04 | 1.73368516 |
| App1          | 2.83E-04 | 4.20406533 |
| Arhgef19      | 3.42E-04 | 2.47739992 |
| Arhgef2       | 9.36E-05 | 2.55139791 |
| Arl6ip1       | 3.20E-05 | 2.54791351 |
| Arl6ip5       | 8.44E-04 | 2.77427141 |
| Arl8a         | 1.67E-04 | 2.82440398 |
| Arpc5         | 8.73E-05 | 1.86758452 |
| Arpp19        | 1.28E-05 | 3.64947521 |
| Arrdc2        | 9.01E-04 | -6.27557   |
| Arsa          | 4.34E-05 | 6.370847   |
| Asns          | 3.35E-04 | 2.78072844 |
| Atp9a         | 8.56E-04 | 2.16457713 |
| Atpif1        | 1.24E-04 | 2.5501942  |
| Axin2         | 3.61E-04 | 5.497375   |
| B230342M21Rik | 2.69E-04 | -14.7425   |
| B930041F14Rik | 2.37E-05 | 22.0824648 |
| BC014805      | 1.95E-04 | -18.3189   |
| BC025446      | 8.36E-04 | -2.01629   |
| Bahd1         | 9.63E-05 | 2.12216903 |
| Bax           | 1.85E-05 | 1.99549019 |
| Bdh2          | 2.24E-05 | -34.9784   |
| Bicc1         | 1.20E-04 | 18.7928948 |
| Birc2         | 8.73E-04 | 1.81624339 |
| Bmper         | 2.53E-04 | -6.48621   |
| Brp44         | 9.60E-05 | -3.25658   |
| Btbd12        | 4.27E-04 | 1.79148864 |
| C430004E15Rik | 1.13E-04 | 4.46482389 |
| C6            | 5.37E-05 | 6.97413294 |
| Cadps2        | 3.82E-04 | -2.10327   |
| Calca         | 3.03E-05 | -3.48328   |
| Calml4        | 1.21E-05 | 12.5252697 |
| Casp2         | 1.21E-04 | 2.13072873 |
| Cbr3          | 3.52E-05 | 8.77716533 |
| Cbx7          | 5.64E-04 | -4.02876   |
| Cc2d1a        | 8.00E-04 | 1.78441103 |
| Ccdc120       | 4.74E-05 | 3.40105977 |
| Ccdc3         | 4.87E-04 | 3.45098905 |
| Ccdc41        | 4.10E-05 | 1.84744877 |
| Ccl2          | 2.82E-04 | -2.98899   |
| Ccl27         | 2.46E-05 | -2.7014    |
| Cd163         | 8.94E-04 | -4.04234   |
| Cd276         | 4.27E-04 | 8.80219703 |
| Cd63          | 7.23E-06 | 8.35289302 |
| Cd9           | 9.73E-04 | 4.66720495 |
| Cdc42se1      | 8.68E-06 | 3.92948924 |
| Cdca3         | 3.67E-04 | 6.43355744 |
| Cdk5rap1      | 6.13E-04 | 1.72029396 |
| Cdkl2         | 2.86E-04 | 2.09910725 |

|           |          |            |
|-----------|----------|------------|
| Cenpm     | 2.90E-04 | 4.66733565 |
| Cenpt     | 6.48E-04 | 4.83949805 |
| Chrn1     | 9.89E-04 | 6.63706536 |
| Cisd1     | 2.77E-04 | -4.37976   |
| Clcn2     | 9.62E-04 | -4.11006   |
| Clec11a   | 6.86E-06 | -2.71002   |
| Clec2d    | 6.93E-04 | -4.10705   |
| Clic6     | 1.33E-05 | -6.4868    |
| Cln6      | 3.30E-04 | 5.17804715 |
| Clstn3    | 9.79E-04 | 8.67054529 |
| Cml1      | 2.94E-04 | -3.68198   |
| Cmtm8     | 8.40E-04 | -2.49685   |
| Cnot6l    | 2.26E-04 | -2.00346   |
| Cnr2      | 4.73E-04 | -7.94725   |
| Col4a1    | 4.18E-05 | 12.3232993 |
| Col4a2    | 1.35E-04 | 4.85410973 |
| Commd10   | 2.47E-04 | 2.01412303 |
| Cox15     | 1.77E-04 | 2.01174456 |
| Cox19     | 4.90E-05 | 2.81211685 |
| Cpne8     | 2.44E-05 | 7.18117383 |
| Cpsf4l    | 3.27E-04 | -11.8112   |
| Cry2      | 4.45E-04 | -2.31467   |
| Cryl1     | 9.80E-06 | -14.4113   |
| Cs        | 3.20E-04 | 2.8295507  |
| Csad      | 3.73E-04 | 8.04647645 |
| Cstb      | 1.60E-05 | 4.37124073 |
| Ctdspl    | 9.20E-04 | 1.73151478 |
| Ctnna1    | 1.02E-04 | 1.86873274 |
| Ctsc      | 2.10E-05 | -6.63038   |
| Cux2      | 8.98E-04 | -16.5328   |
| Cxcl16    | 2.00E-04 | 3.77847554 |
| Cyp2b10   | 1.18E-05 | -88.7287   |
| Cyp2b13   | 1.76E-05 | -48.2838   |
| Cyp2b9    | 4.38E-05 | -43.2179   |
| Cyp2c37   | 8.36E-04 | -8.96284   |
| Cyp2d13   | 1.50E-04 | -7.22417   |
| Cyp2d22   | 5.66E-04 | -1.82309   |
| Cyp2d26   | 4.40E-05 | -3.02588   |
| Cyp2d40   | 5.74E-04 | -3.42828   |
| Cyp2d9    | 1.55E-06 | 46.377887  |
| Cyp2f2    | 2.22E-05 | -215.906   |
| Cyp4b1    | 2.84E-04 | -4.22471   |
| Cyp4f15   | 8.74E-06 | -4.31021   |
| Cyp4f16   | 4.30E-04 | 2.04223756 |
| D5Wsu178e | 8.14E-05 | 1.91493843 |
| D9Wsu20e  | 3.13E-04 | -2.75465   |
| Dab1      | 1.42E-04 | 3.20297236 |
| Dab2ip    | 2.94E-04 | 2.49379668 |
| Dact2     | 1.62E-06 | 2.3065284  |

|          |          |            |
|----------|----------|------------|
| Dalrd3   | 4.68E-04 | -1.88149   |
| Dbnidd2  | 9.24E-05 | 3.28393205 |
| Dbt      | 1.12E-04 | -3.78454   |
| Dcun1d3  | 7.21E-05 | -2.09216   |
| Dcxr     | 7.15E-04 | -3.40295   |
| Ddt      | 5.87E-04 | -3.21716   |
| Ddx1     | 7.32E-04 | 1.84027516 |
| Dhrs1    | 3.70E-04 | -1.99509   |
| Dhrs7b   | 1.02E-06 | 2.11608862 |
| Dhx32    | 4.70E-05 | 1.93486846 |
| Dpm1     | 1.46E-04 | -2.02808   |
| Dpp7     | 8.28E-04 | 1.81158764 |
| Dscr1l2  | 5.29E-04 | 2.84494212 |
| Dusp7    | 4.90E-04 | -1.74276   |
| Dusp8    | 7.19E-04 | 2.79794631 |
| Dync1i2  | 9.65E-06 | 1.9527131  |
| Dynll1   | 2.45E-04 | 3.10738501 |
| Dyrk3    | 7.22E-04 | 3.95741818 |
| EG13909  | 2.20E-04 | -9.73038   |
| EG317677 | 6.76E-04 | -2.81457   |
| EG381438 | 4.79E-04 | -1.71127   |
| EG622339 | 3.08E-04 | 1.9332899  |
| Ecm1     | 3.21E-04 | -13.5721   |
| Efha1    | 9.73E-06 | 2.92920979 |
| Eftud2   | 1.07E-05 | 1.89153915 |
| Egln2    | 4.17E-04 | -2.06385   |
| Egln3    | 1.04E-04 | 4.86220511 |
| Ehd4     | 4.48E-04 | 2.75529913 |
| Elf3     | 5.52E-05 | 6.12369871 |
| Emp1     | 1.24E-04 | 12.5514767 |
| Emp2     | 1.12E-04 | 5.7664141  |
| Endod1   | 1.42E-07 | 7.8486159  |
| Entpd2   | 5.69E-04 | 2.90680774 |
| Entpd5   | 1.99E-04 | 2.56830405 |
| Epb4.1   | 5.58E-04 | -1.80908   |
| Epb4.1l1 | 5.57E-04 | 3.44698027 |
| Epha1    | 2.71E-04 | 2.84566264 |
| Ephx1    | 1.61E-05 | 2.80389292 |
| Eps8l2   | 6.55E-05 | 6.86723573 |
| Erh      | 2.79E-04 | 2.10784138 |
| Ermp1    | 9.38E-05 | 4.55352671 |
| Espn     | 6.26E-05 | 29.3903271 |
| Ets2     | 7.25E-05 | 4.7681715  |
| Evc2     | 4.41E-04 | -2.32208   |
| Expi     | 4.28E-05 | -6.75794   |
| F10      | 6.77E-04 | -1.94964   |
| F11      | 3.31E-04 | -8.47234   |
| F2r      | 2.62E-04 | 2.90232796 |
| F7       | 3.12E-04 | -2.98327   |



|         |          |            |
|---------|----------|------------|
| F8      | 1.54E-04 | -5.92339   |
| Fam110a | 1.93E-04 | 4.30880332 |
| Fam164a | 4.06E-04 | 6.52609459 |
| Fam173b | 9.16E-04 | -1.68183   |
| Fblim1  | 5.22E-04 | 3.43576494 |
| Fbxo25  | 9.29E-06 | 3.10852482 |
| Fbxo31  | 7.47E-04 | -4.52386   |
| Fbxo6   | 3.43E-05 | 3.22176366 |
| Fchsd1  | 3.83E-04 | 11.0545731 |
| Fdps    | 2.90E-04 | 2.23265118 |
| Fez2    | 8.53E-04 | 1.79814719 |
| Fgf1    | 3.05E-04 | -13.512    |
| Fkbp11  | 2.14E-04 | 7.11409587 |
| Fkbp1a  | 4.66E-04 | 3.45824515 |
| Fmo3    | 9.04E-05 | -71.3542   |
| Fn3k    | 6.30E-04 | -11.6692   |
| Fnbp1l  | 1.00E-05 | 2.84447276 |
| Folr2   | 3.50E-05 | -6.81736   |
| Foxa1   | 4.57E-05 | 2.916804   |
| Foxo1   | 4.79E-04 | -3.03203   |
| Frap1   | 8.52E-04 | 1.85795558 |
| Frk     | 2.01E-04 | 5.19458932 |
| Ftcd    | 2.23E-04 | -13.3403   |
| Gadd45g | 9.82E-05 | -3.78526   |
| Gal3st4 | 2.40E-04 | -1.84154   |
| Gale    | 2.46E-05 | 5.07073678 |
| Gars    | 7.00E-06 | 3.70669652 |
| Gas6    | 7.56E-05 | 5.51931207 |
| Gas8    | 2.97E-05 | 2.62560914 |
| Gca     | 9.60E-04 | 4.0888758  |
| Gcdh    | 3.24E-04 | -2.2368    |
| Gchfr   | 3.18E-04 | -2.07326   |
| Gdf2    | 7.21E-04 | -2.05376   |
| Ghr     | 4.19E-04 | -5.4207    |
| Gipc2   | 1.19E-04 | 3.66277558 |
| Gls2    | 5.44E-05 | -62.6227   |
| Gm2a    | 5.60E-04 | -2.2614    |
| Gmcl1   | 2.35E-04 | 2.07143982 |
| Gnmt    | 6.02E-04 | -6.18479   |
| Gnptab  | 9.70E-06 | 1.81153841 |
| Golm1   | 1.38E-05 | 9.83342183 |
| Gpld1   | 9.75E-04 | -3.43231   |
| Gpr172b | 1.19E-04 | 2.42380173 |
| Gpr180  | 1.01E-04 | -2.45283   |
| Gpt1    | 4.61E-04 | -2.12437   |
| Gpx4    | 5.35E-04 | 2.48088478 |
| Gpx7    | 1.08E-04 | 4.00729327 |
| Gspt2   | 1.61E-05 | 6.08805767 |
| Gstm1   | 2.46E-05 | 2.28291739 |

|           |          |            |
|-----------|----------|------------|
| Gstm2     | 4.66E-05 | 6.44653885 |
| Gstm4     | 7.11E-04 | 1.81189619 |
| Gstm6     | 4.12E-05 | 4.13018338 |
| Gstp1     | 1.39E-05 | 4.07247374 |
| Gtf2h2    | 9.72E-04 | 1.77415063 |
| Gtpbp2    | 2.34E-04 | 1.87302045 |
| Guca2a    | 4.09E-04 | 2.03495234 |
| Gzf1      | 7.43E-04 | -1.721     |
| H2-M3     | 3.44E-04 | -2.36402   |
| Hao1      | 1.97E-04 | -2.9846    |
| Hapln4    | 6.39E-04 | 3.08044901 |
| Hbs1l     | 5.08E-04 | -2.4788    |
| Hexim1    | 6.32E-05 | -4.40681   |
| Hgfac     | 5.11E-05 | -3.14928   |
| Hist1h1c  | 4.66E-05 | 4.50174668 |
| Hist1h2bf | 3.34E-04 | 1.89451708 |
| HK3       | 9.92E-04 | -5.45138   |
| Hmga1     | 6.39E-04 | -1.86638   |
| Hn1       | 7.85E-07 | 10.3701092 |
| Hnrnpab   | 8.03E-04 | 1.77401529 |
| Hnrpd1    | 2.24E-04 | -1.83632   |
| Hrg       | 4.75E-04 | -4.86692   |
| Hrsp12    | 7.73E-04 | -3.05712   |
| Hsd11b1   | 3.65E-05 | -8.9528    |
| Hsd17b7   | 6.22E-04 | 2.49131155 |
| Hspbap1   | 4.68E-04 | 3.53454309 |
| Htatif2   | 4.70E-05 | 2.47315391 |
| Icam1     | 9.71E-04 | 3.78196231 |
| Ick       | 5.20E-04 | 2.42059246 |
| Igf2bp3   | 1.24E-04 | 2.73949336 |
| Igfbp2    | 9.16E-04 | -36.5345   |
| Ihh       | 1.01E-04 | 4.49585707 |
| Il11ra1   | 4.06E-04 | -1.92636   |
| Il18bp    | 7.27E-05 | -2.9821    |
| Inmt      | 9.69E-04 | -14.5052   |
| Ipo5      | 1.28E-04 | 2.34291351 |
| Itpr3     | 2.16E-04 | 5.50769976 |
| Ivd       | 6.61E-04 | -2.09533   |
| Jak3      | 4.21E-04 | 2.74153619 |
| Kat2a     | 4.16E-04 | 1.76294087 |
| Kcnk6     | 8.31E-04 | -2.77698   |
| Kif3a     | 7.11E-04 | 2.07202783 |
| Klf1      | 6.43E-07 | -8.34985   |
| Klf15     | 2.56E-04 | -4.00585   |
| Klf6      | 2.47E-04 | 5.83699605 |
| Klhl26    | 5.38E-06 | -2.02032   |
| Klhl7     | 8.85E-05 | -2.01654   |
| Klk1b4    | 7.71E-05 | 8.31310478 |
| Klkb1     | 6.42E-04 | -2.54297   |

|              |          |            |
|--------------|----------|------------|
| Kng1         | 3.97E-05 | -1.77951   |
| Kras         | 1.55E-04 | -3.02589   |
| Krt18        | 1.32E-04 | 3.72223215 |
| Krt8         | 1.08E-04 | 3.77058267 |
| LOC100040592 | 1.43E-06 | 2.18863399 |
| LOC100042777 | 6.02E-05 | 1.89604731 |
| LOC100044101 | 4.87E-04 | -1.74904   |
| LOC100044221 | 8.60E-05 | 7.00942768 |
| LOC100044475 | 2.57E-04 | 2.8846875  |
| LOC100046120 | 8.32E-06 | 2.00887118 |
| LOC100047046 | 3.35E-04 | 2.55862448 |
| LOC100047167 | 8.63E-04 | -2.99755   |
| LOC100047173 | 8.52E-05 | -4.77773   |
| LOC100047749 | 6.24E-05 | -2.45135   |
| LOC100047762 | 6.71E-04 | -11.0511   |
| LOC100047911 | 9.20E-04 | 2.33775403 |
| LOC100047934 | 6.68E-04 | 6.68060687 |
| LOC100047937 | 9.79E-04 | -2.52503   |
| LOC100048295 | 7.31E-04 | -1.9916    |
| LOC100048331 | 1.34E-04 | 2.27949842 |
| LOC626152    | 1.02E-04 | 4.71269081 |
| Large        | 4.54E-04 | 3.2388664  |
| Lasp1        | 3.15E-04 | 2.95115833 |
| Lcn2         | 1.88E-04 | 33.0509679 |
| Lgals1       | 2.59E-05 | 10.3626513 |
| Lgals3       | 1.07E-04 | 5.65502109 |
| Litaf        | 5.65E-04 | 2.55841501 |
| Lmo2         | 6.56E-04 | 4.73408637 |
| Lpl          | 4.03E-04 | 7.79137806 |
| Lrp1         | 6.61E-04 | -2.45637   |
| Lrrc20       | 4.12E-04 | 2.54493723 |
| Lrrc59       | 4.38E-04 | 2.42946651 |
| Lrrc8        | 9.83E-04 | -2.17121   |
| Lrtm1        | 7.21E-05 | -38.9861   |
| Lsm3         | 8.93E-04 | 1.92906444 |
| Lxn          | 1.69E-04 | 7.04379125 |
| Ly6e         | 5.02E-04 | 3.67997468 |
| Lym5         | 1.06E-05 | -3.28435   |
| Macrod1      | 1.32E-06 | -5.21071   |
| Maged2       | 6.39E-05 | 3.02988986 |
| Magix        | 7.31E-04 | -4.15551   |
| Map1lc3b     | 9.50E-05 | -2.20016   |
| Map3k1       | 3.48E-04 | 4.64190058 |
| Mapkap2      | 6.99E-04 | 2.69650802 |
| Mapre2       | 4.03E-04 | -2.09761   |
| Mapt         | 8.43E-05 | 9.91158863 |
| Mark2        | 6.33E-04 | 1.96377233 |
| Masp2        | 3.49E-04 | -1.78851   |
| Mcc          | 9.62E-04 | -3.70952   |

|         |          |            |
|---------|----------|------------|
| Mcl1    | 5.04E-04 | 1.73344474 |
| Mcm10   | 4.28E-04 | -4.33344   |
| Mcoln1  | 6.05E-04 | -1.96673   |
| Med19   | 6.22E-04 | 2.05025167 |
| Metrn   | 1.16E-04 | -3.20154   |
| Mfge8   | 1.16E-05 | 9.55465742 |
| Mgat4b  | 1.60E-04 | 2.15810725 |
| Mgmt    | 1.11E-04 | -8.73689   |
| Mif     | 6.42E-05 | 1.83993317 |
| Mkln1   | 1.53E-04 | 1.81330896 |
| Mrxip1  | 6.74E-04 | -2.01998   |
| Mmp24   | 6.62E-05 | 5.0303076  |
| Morf4l2 | 4.46E-05 | 1.75547621 |
| Mosc2   | 5.93E-04 | -2.77778   |
| Mpst    | 2.57E-04 | -2.86036   |
| Mrc1    | 7.02E-04 | -4.82647   |
| Mre11a  | 5.72E-05 | 3.42271175 |
| Mrgpra2 | 4.53E-04 | -2.1359    |
| Mrpl39  | 2.82E-04 | -1.80296   |
| Msi2    | 4.14E-04 | 2.38220587 |
| Mtdh    | 8.59E-05 | 1.79360615 |
| Mthfd1  | 7.04E-04 | -2.03068   |
| Mug2    | 6.30E-04 | -8.6757    |
| Mupcdh  | 6.07E-04 | 2.16527079 |
| Mvp     | 7.36E-05 | 3.82545226 |
| Mylc2b  | 1.05E-04 | 3.07922539 |
| Myo9b   | 2.26E-04 | 3.09672305 |
| N4bp2   | 3.52E-04 | -3.10433   |
| Nadk    | 4.33E-04 | 2.09331583 |
| Nans    | 1.15E-04 | 2.73383891 |
| Ndrp2   | 6.63E-04 | -4.11093   |
| Ndufb10 | 6.29E-04 | -2.31516   |
| Ndufb2  | 6.80E-04 | -2.7802    |
| Ndufb5  | 3.77E-04 | -2.04925   |
| Ndufb7  | 9.07E-06 | -2.18487   |
| Nedd9   | 2.68E-04 | 4.43976789 |
| Nek3    | 1.12E-04 | 1.99149631 |
| Nfkbia  | 1.04E-04 | -2.22916   |
| Nhej1   | 5.66E-04 | 2.07562326 |
| Nid1    | 2.85E-08 | 5.14178471 |
| Noc3l   | 2.85E-04 | 2.29701296 |
| Nola2   | 4.87E-04 | 2.16635435 |
| Npal2   | 3.44E-06 | 4.05607113 |
| Nr1i3   | 2.45E-04 | -14.4542   |
| Ntrk2   | 2.91E-04 | -30.1584   |
| Nudt18  | 9.85E-04 | 2.3830347  |
| Nudt2   | 5.39E-06 | 2.16941857 |
| Oasl1   | 4.52E-04 | 7.35337373 |
| Olfml1  | 2.72E-04 | 1.8390534  |

|          |          |            |
|----------|----------|------------|
| Olfr1443 | 6.34E-04 | -2.12648   |
| Oprs1    | 8.59E-06 | 2.01932494 |
| Orm1     | 7.41E-04 | -2.02456   |
| Osbpl3   | 3.68E-04 | 18.0922779 |
| Ostb     | 4.02E-04 | 4.1935051  |
| Otc      | 3.36E-04 | -4.89165   |
| Pacs2    | 3.15E-04 | 2.12057145 |
| Pafah1b3 | 7.80E-04 | 4.59204291 |
| Palmd    | 2.79E-04 | 2.10461184 |
| Pank2    | 2.88E-04 | 1.69764299 |
| Parp6    | 4.82E-04 | -2.02717   |
| Pdgfa    | 9.81E-05 | 5.74089064 |
| Pdgfb    | 4.21E-04 | 6.18314475 |
| Pdlim7   | 6.94E-05 | 5.0245449  |
| Pdzk1ip1 | 9.48E-05 | 5.87095638 |
| Pecr     | 2.10E-05 | -2.68099   |
| Pgd      | 8.87E-05 | 2.73574608 |
| Pgp      | 2.15E-05 | 2.5542197  |
| Pgs1     | 6.54E-04 | 2.35196165 |
| Pigr     | 5.45E-05 | -8.02032   |
| Pim3     | 3.96E-04 | -2.62671   |
| Pkia     | 2.92E-05 | 4.89660812 |
| Pkp2     | 2.04E-04 | 2.93200103 |
| Pla1a    | 4.56E-04 | -2.31842   |
| Plekha1  | 2.41E-05 | 3.33456712 |
| Pols     | 9.65E-04 | -2.0273    |
| Ppap2c   | 1.27E-05 | 4.67010386 |
| Ppia     | 3.27E-04 | 1.9995561  |
| Ppl      | 3.59E-04 | 13.0816768 |
| Ppm1k    | 1.10E-04 | -4.71149   |
| Prdx6    | 5.47E-04 | -2.0469    |
| Prhoxnb  | 1.69E-04 | -13.125    |
| Prickle1 | 5.99E-04 | -6.10051   |
| Prkx     | 6.14E-05 | 2.82922247 |
| Prss8    | 2.40E-04 | 9.71722865 |
| Psmc10   | 4.33E-04 | 1.94670316 |
| Ptpn14   | 6.54E-04 | 4.96563779 |
| Ptprs    | 7.03E-04 | 2.97635878 |
| Pxmp2    | 6.06E-06 | -4.95416   |
| Pygb     | 7.92E-05 | 12.0580135 |
| Rab22a   | 1.79E-04 | -1.72656   |
| Rab27a   | 4.55E-04 | -3.78577   |
| Rab3ip   | 1.24E-04 | -2.00089   |
| Ramp1    | 3.05E-04 | -4.83407   |
| Rassf1   | 5.45E-06 | 2.85945493 |
| Rassf3   | 3.82E-04 | 3.4622682  |
| Rcan3    | 1.83E-04 | 3.82532056 |
| Rcl1     | 8.43E-04 | -1.69053   |
| Rdh20    | 8.07E-04 | -9.40044   |

|           |          |            |
|-----------|----------|------------|
| Reep4     | 4.22E-04 | 5.67736661 |
| Rhbdf1    | 3.79E-04 | 4.24212344 |
| Rhoc      | 6.66E-05 | 3.52380684 |
| Rhod      | 2.20E-04 | 2.3952899  |
| Rnf44     | 4.56E-04 | 1.72153189 |
| Rnpep     | 7.83E-04 | 3.19962116 |
| Rpa1      | 5.84E-04 | 2.39617379 |
| Rpia      | 2.68E-05 | 1.96997366 |
| Rpl22     | 6.30E-04 | -1.73259   |
| Rps6kl1   | 7.09E-04 | 3.76917568 |
| Rras      | 3.20E-05 | 4.48076854 |
| Rxra      | 3.65E-04 | -2.24654   |
| S100a11   | 7.67E-07 | 34.0571615 |
| Sall1     | 4.10E-04 | -3.07941   |
| Samd9l    | 3.40E-05 | 3.43362966 |
| Samhd1    | 6.69E-04 | -2.20887   |
| Sardh     | 1.83E-06 | -4.67937   |
| Scamp5    | 1.33E-05 | 9.20759442 |
| Scara3    | 4.03E-04 | 6.88122321 |
| Scarf1    | 2.08E-06 | -2.41693   |
| Scd2      | 6.05E-04 | 6.79814275 |
| Scnn1a    | 2.48E-04 | -15.7552   |
| Sdc2      | 2.39E-05 | -2.42333   |
| Sdcbp2    | 1.54E-05 | 8.9844838  |
| Sdhb      | 4.16E-04 | -1.91593   |
| Sdpr      | 2.02E-04 | -3.53426   |
| Sds       | 2.60E-05 | -126.897   |
| Sdsl      | 1.68E-04 | -22.0833   |
| Sec14l4   | 4.04E-04 | -4.52097   |
| Sema3b    | 3.19E-04 | -2.57577   |
| Sepn1     | 4.95E-04 | 2.05764704 |
| Serpina11 | 5.89E-04 | -3.0292    |
| Serpina12 | 1.87E-05 | -12.6949   |
| Serpina1a | 1.05E-05 | -31.6368   |
| Serpina1b | 3.40E-04 | -2.80168   |
| Serpina1c | 2.87E-06 | -62.6063   |
| Serpina1d | 2.98E-04 | -3.30845   |
| Serpina3k | 9.41E-04 | -98.5689   |
| Serpina3m | 3.40E-07 | -34.8319   |
| Serpinb6a | 1.53E-04 | 4.23484771 |
| Sftpd     | 6.16E-05 | 2.99782658 |
| Sfxn1     | 2.58E-04 | -5.85647   |
| Sh3bgrl3  | 5.10E-04 | 1.9319117  |
| Shroom3   | 9.06E-04 | 3.35828539 |
| Siat9     | 5.32E-04 | -7.67896   |
| Sirpa     | 9.05E-04 | 3.21142754 |
| Sirt3     | 3.37E-04 | -2.03077   |
| Skap2     | 1.32E-04 | 1.78979886 |
| Slc13a4   | 7.58E-04 | -4.31858   |

|            |          |            |
|------------|----------|------------|
| Slc17a2    | 9.45E-04 | -3.36301   |
| Slc22a7    | 2.87E-04 | -3.5632    |
| Slc24a6    | 7.94E-04 | -2.74134   |
| Slc25a38   | 6.48E-04 | -2.19845   |
| Slc27a5    | 2.37E-05 | -2.08916   |
| Slc29a1    | 1.26E-04 | -2.26657   |
| Slc2a9     | 6.19E-04 | -3.19262   |
| Slc35a5    | 8.18E-04 | -2.06092   |
| Slc38a2    | 7.95E-04 | -3.11855   |
| Slc38a3    | 7.92E-04 | -5.26719   |
| Slc6a6     | 3.46E-04 | 2.10417785 |
| Slc6a8     | 3.22E-04 | 7.94274867 |
| Slc7a4     | 4.28E-04 | 3.3043869  |
| Slco2a1    | 3.94E-04 | -3.76841   |
| Smpd13b    | 4.20E-04 | 3.06668507 |
| Snn        | 9.01E-05 | 3.98790866 |
| Snora65    | 4.01E-04 | 2.31756693 |
| Sntg2      | 2.56E-04 | -11.8287   |
| Snurf      | 2.55E-04 | 2.50050635 |
| Snx24      | 5.98E-04 | 2.45162935 |
| Sort1      | 2.29E-04 | 2.40353993 |
| Spata2L    | 2.77E-04 | -4.17405   |
| Spire2     | 7.28E-04 | 4.02065006 |
| Spon2      | 2.65E-04 | 24.0931925 |
| Spp1       | 4.46E-05 | 6.81867772 |
| Sqle       | 5.74E-05 | 5.32501211 |
| Sqrdl      | 3.12E-04 | -7.34294   |
| Sqstm1     | 8.61E-04 | 2.06643591 |
| Sra1       | 3.80E-04 | -2.27861   |
| Srd5a3     | 6.51E-05 | 2.15263935 |
| Srebf2     | 8.52E-04 | 1.81301308 |
| Srpk1      | 5.82E-04 | 1.83344273 |
| Srxn1      | 8.13E-05 | 5.65093071 |
| St3gal1    | 2.36E-04 | -2.06157   |
| St3gal5    | 4.02E-04 | -4.50168   |
| St6galnac2 | 5.38E-05 | 12.2217116 |
| Stim1      | 9.72E-04 | -2.45096   |
| Stk19      | 7.53E-04 | -1.89697   |
| Stk39      | 6.95E-04 | 4.41506952 |
| Stt3b      | 3.40E-05 | 1.83562695 |
| Sult1d1    | 7.39E-05 | -6.41907   |
| Syt9       | 1.98E-04 | -1.72246   |
| Taldo1     | 1.54E-04 | 1.82235335 |
| Tax1bp3    | 5.67E-06 | 4.15111727 |
| Tbc1d2     | 7.43E-04 | 4.29826522 |
| Tbcel      | 1.80E-04 | 2.9209361  |
| Tctex1d2   | 8.59E-05 | 2.18366834 |
| Tdrkh      | 5.52E-04 | 1.82715481 |
| Tes        | 2.12E-05 | 22.4982001 |

|           |          |            |
|-----------|----------|------------|
| Tfrc      | 3.97E-04 | 6.50376893 |
| Tgfbr3    | 1.74E-04 | -5.48013   |
| Tgm2      | 6.29E-05 | 4.4237609  |
| Thumpd1   | 4.24E-04 | 1.8077756  |
| Timd2     | 3.23E-04 | -1.73523   |
| Timd4     | 6.89E-04 | -5.18924   |
| Tjp2      | 1.97E-04 | 2.96672521 |
| Tjp3      | 1.52E-04 | 14.1780422 |
| Tk1       | 1.04E-04 | -4.98189   |
| Tmem176b  | 1.08E-05 | 4.39129996 |
| Tmem183a  | 8.63E-06 | -1.93406   |
| Tmem184a  | 4.78E-04 | 2.33863424 |
| Tmem43    | 1.72E-05 | 6.06137751 |
| Tmem45b   | 3.69E-04 | 3.04869683 |
| Tmem63a   | 1.26E-04 | -5.1447    |
| Tmem97    | 3.48E-04 | 1.90284094 |
| Tnfaip1   | 2.33E-04 | 1.99824155 |
| Tnfrsf12a | 3.25E-05 | 13.6314625 |
| Tnfrsf19  | 6.21E-04 | 5.98021744 |
| Tnip1     | 2.95E-04 | 5.0966841  |
| Tnnc1     | 9.99E-04 | -3.42942   |
| Tpd52     | 1.04E-06 | 4.20638192 |
| Tpd52l1   | 4.50E-04 | -5.28516   |
| Tpm4      | 1.56E-04 | 3.25967553 |
| Tpp1      | 5.55E-04 | -1.68965   |
| Tpr       | 3.78E-05 | 2.78583348 |
| Trim47    | 3.85E-04 | 3.73184458 |
| Tsc22d3   | 6.08E-04 | -4.17941   |
| Tspan17   | 4.49E-04 | 5.21983328 |
| Tssc1     | 3.30E-04 | 1.98398527 |
| Ttc17     | 7.87E-04 | -1.80439   |
| Ttc39a    | 1.03E-04 | 4.19732463 |
| Ttpa      | 6.82E-04 | -1.85766   |
| Tuba1b    | 5.61E-04 | 3.37355738 |
| Tubb2b    | 1.81E-06 | 16.1140618 |
| Tuft1     | 3.96E-04 | 3.44481916 |
| Txnrd2    | 4.39E-04 | -1.70926   |
| Uap1l1    | 3.66E-05 | 8.85339661 |
| Ube2e2    | 3.20E-04 | 1.78436327 |
| Unc13b    | 1.87E-07 | 10.4844222 |
| Uox       | 2.20E-04 | -3.04812   |
| Upp2      | 5.04E-05 | -27.9343   |
| Uroc1     | 3.75E-04 | -15.2604   |
| Usp20     | 3.33E-05 | 6.33147821 |
| Usp22     | 1.96E-04 | 2.31539902 |
| Vasn      | 1.40E-04 | 2.12743778 |
| Vcl       | 5.50E-05 | 2.49875062 |
| Vegfa     | 2.16E-04 | -2.46239   |
| Wfdc2     | 2.74E-04 | 17.2208331 |



|               |          |            |
|---------------|----------|------------|
| Wfdc3         | 3.48E-04 | -3.17354   |
| Xpnpep1       | 7.77E-04 | 2.00852418 |
| Ywhah         | 4.13E-05 | 3.18699705 |
| Zap70         | 5.35E-04 | -20.0686   |
| Zbtb33        | 3.82E-04 | 1.8299735  |
| Zcchc3        | 8.73E-04 | 1.87685574 |
| Zfp276        | 6.29E-04 | -3.38043   |
| Zfp36         | 2.44E-04 | -2.2902    |
| Zfp41         | 9.58E-05 | 2.80676543 |
| Zfp428        | 3.20E-05 | 1.82642064 |
| Zfp704        | 7.76E-04 | 4.73428808 |
| Zfp748        | 2.13E-04 | -1.99739   |
| Zmat3         | 8.05E-04 | 2.48852169 |
| Znrf2         | 7.09E-04 | 1.76941982 |
| 0610012D14Rik | 5.70E-05 | -5.28578   |
| 1110001J03Rik | 7.63E-04 | -3.08507   |
| 1110012J17Rik | 9.08E-05 | -5.28578   |
| 1300007L22Rik | 2.46E-04 | -2.25719   |
| 1300017J02Rik | 9.93E-04 | -1.90638   |
| 1600016N20Rik | 1.25E-04 | 2.04668069 |
| 1700001C19Rik | 8.82E-04 | -3.76203   |
| 1700003F12Rik | 2.82E-04 | 5.15649977 |
| 1700029P11Rik | 3.03E-04 | -2.1714    |
| 1700088E04Rik | 4.18E-04 | 2.15520493 |
| 1810014F10Rik | 1.50E-05 | -2.69606   |
| 1810049H13Rik | 9.42E-04 | -1.94905   |
| 2010001J22Rik | 9.03E-05 | -12.4782   |
| 2310003H01Rik | 8.73E-05 | 2.86203284 |
| 2310016C08Rik | 9.38E-04 | 2.63209151 |
| 2310016E02Rik | 7.65E-04 | 1.68971152 |
| 2310036D22Rik | 3.09E-04 | -2.20467   |
| 2310045A20Rik | 8.45E-04 | 7.18483712 |
| 2410015M20Rik | 1.66E-04 | -2.11094   |
| 2410022L05Rik | 5.35E-06 | 3.18921281 |
| 2610029G23Rik | 1.92E-04 | 2.23008202 |
| 2810007J24Rik | 1.98E-04 | -16.5503   |
| 4732429D16Rik | 9.79E-04 | -3.12541   |
| 4833426J09Rik | 1.86E-04 | -2.51247   |
| 4930506M07Rik | 3.67E-04 | 1.8228317  |
| 4930570C03Rik | 3.65E-05 | 1.88674617 |
| 4933426M11Rik | 4.81E-04 | -1.72543   |
| 5133400G04Rik | 8.29E-04 | 3.05505826 |
| 5133401N09Rik | 5.58E-04 | -2.02583   |
| 5730596K20Rik | 1.48E-04 | 2.50728995 |
| 5930434B04Rik | 1.16E-04 | -2.32978   |
| 9530008L14Rik | 1.14E-04 | -4.9925    |
| 9530058B02Rik | 1.21E-04 | -2.58032   |

**Supplementary Table 3**

Genes differently expressed in AKT-CAT+CCI4 tumors in comparison to normal PBS treated liver tissue ( $p < 0.001$ , fold change  $> 1.5$ )

| <b>Gene_Symbol</b> | <b>p-value</b> | <b>Fold change</b> |
|--------------------|----------------|--------------------|
| A230050P20Rik      | 0.000933785    | 1.648003032        |
| A330080J22Rik      | 0.000164682    | -2.54129           |
| AA415398           | 0.000187057    | -3.85901           |
| AI316807           | 1.69E-06       | -2.44007           |
| AI595366           | 0.000584557    | 2.384216487        |
| AU040320           | 6.67E-05       | 2.312967653        |
| Aatk               | 0.000901021    | -3.42931           |
| Abat               | 0.00048695     | -4.37096           |
| Abcc3              | 0.000692275    | -1.84754           |
| Abcg1              | 0.000247274    | -2.03987           |
| Abi1               | 0.00078521     | 1.694785991        |
| Acad10             | 0.000213425    | -3.65802           |
| Acot10             | 5.91E-05       | 5.304195619        |
| Acsl4              | 0.000514296    | 1.923409821        |
| Acta2              | 0.000166493    | 3.591786303        |
| Actn3              | 0.000885564    | -1.66544           |
| Acvr2b             | 0.000468227    | -2.87719           |
| Adam9              | 0.000557275    | 3.194806523        |
| Adcy4              | 0.000902979    | -3.75106           |
| Adra1b             | 3.80E-05       | -4.08988           |
| Afmid              | 0.000732042    | -9.13949           |
| Agxt2l1            | 0.000715881    | -8.04252           |
| Ahnak              | 0.000146484    | 3.062955998        |
| Aifm1              | 0.000282707    | 3.64495247         |
| Aldh1a1            | 0.000223052    | 3.59590642         |
| Aldh1a7            | 0.00025024     | 2.917884884        |
| Alg1               | 0.000757181    | -2.38175           |
| Ambra1             | 0.000927261    | -2.52232           |
| Amigo2             | 0.0002666      | -2.58337           |
| Ank                | 0.000814545    | -3.14639           |
| Ankrd10            | 0.000424859    | 3.56477009         |
| Anks1              | 0.00051499     | -5.23779           |
| Ankzf1             | 0.000108672    | -2.57416           |
| Anxa2              | 0.0001067      | 13.92738263        |
| Anxa3              | 0.00065043     | 2.269544752        |
| Anxa5              | 2.09E-05       | 16.56018468        |
| Ap3m1              | 0.00093296     | -1.88766           |
| Ap4s1              | 0.000483519    | -1.63456           |
| Ap1p2              | 0.00083649     | 2.707195183        |
| Ap1p1              | 0.000248425    | 3.69253038         |
| Arfl4              | 0.000942981    | -2.98663           |

|               |             |             |
|---------------|-------------|-------------|
| Arg1          | 0.000974616 | -2.01267    |
| Arhgap17      | 0.000942654 | 2.409493404 |
| Arhgef15      | 0.000468975 | -3.39804    |
| Arhgef19      | 0.000349687 | 1.609797874 |
| Arl3          | 0.00075931  | -2.06989    |
| Arl6ip1       | 0.000107148 | 2.324343547 |
| Arl8a         | 1.73E-05    | 5.277239792 |
| Arpc1b        | 0.000792188 | 1.696698225 |
| Arpc5         | 0.000610903 | 1.913578948 |
| Arpp19        | 7.01E-06    | 4.082865845 |
| Arrdc2        | 0.000374065 | -7.46904    |
| Arsa          | 7.88E-06    | 6.31771804  |
| Asap3         | 0.000738795 | 2.109940563 |
| Atp5a1        | 0.000430479 | 2.113119514 |
| Atp5sl        | 0.00055888  | -2.93047    |
| Atp6v1a       | 0.000411433 | 2.360689794 |
| Atpif1        | 0.000940717 | 1.734701666 |
| Aven          | 0.000160833 | -2.66044    |
| B230342M21Rik | 0.000811251 | -6.80689    |
| BC013529      | 6.04E-05    | 2.359586884 |
| BC021381      | 0.000267085 | -4.76723    |
| BC030183      | 0.000358828 | -6.59151    |
| Bcap31        | 0.000220319 | 4.753416518 |
| Bdh2          | 0.00069987  | -5.04538    |
| Bfar          | 0.000665431 | -2.26018    |
| Blmh          | 0.00017582  | -1.72279    |
| Brp44         | 8.49E-05    | -2.20908    |
| Bxdc1         | 0.000207898 | 1.939788951 |
| C1galt1c1     | 0.000410633 | 2.364474247 |
| C1qtnf4       | 3.76E-05    | -2.10333    |
| C430004E15Rik | 0.00081957  | 2.307406544 |
| C4bp          | 0.000128723 | 2.40663461  |
| C6            | 0.000234202 | 5.731447305 |
| Calml4        | 0.000913301 | 6.514530661 |
| Casp4         | 0.000117286 | 7.735148515 |
| Cbx7          | 0.000672306 | -3.20614    |
| Ccdc120       | 0.000345418 | 2.997772655 |
| Ccl27         | 0.000750144 | -2.03547    |
| Cct8          | 0.000660755 | 1.643134246 |
| Cd163         | 0.000731628 | -4.30034    |
| Cd63          | 0.000204252 | 6.596654177 |
| Cd9           | 0.000171361 | 4.115243273 |
| Cdc42se1      | 0.000408013 | 3.138131117 |
| Cdca3         | 0.000208133 | 6.601270084 |
| Cdipt         | 0.000541462 | 1.743183716 |
| Cdt1          | 0.000839207 | 6.613362961 |
| Cisd1         | 0.00037873  | -2.57738    |

|               |             |             |
|---------------|-------------|-------------|
| Cldn9         | 0.000251232 | -3.33049    |
| Clec2d        | 6.89E-05    | -3.43629    |
| Cml4          | 1.86E-05    | 69.34716578 |
| Col18a1       | 8.07E-05    | -2.2142     |
| Col4a1        | 0.000167914 | 7.086619753 |
| Col4a2        | 4.80E-05    | 4.471272077 |
| Col6a1        | 0.000595509 | 3.181936781 |
| Coro1c        | 0.000294701 | 2.293162477 |
| Cox19         | 4.58E-05    | 2.692572807 |
| Cpne8         | 0.00057891  | 5.349453018 |
| Cs            | 9.47E-05    | 2.822984742 |
| Cstb          | 0.000110304 | 4.55145419  |
| Cstf2         | 0.00049118  | 1.601065669 |
| Ctsb          | 8.50E-05    | 1.908112914 |
| Cul1          | 0.000303293 | 1.812484027 |
| Cux2          | 0.000578542 | -8.39277    |
| Cx3cl1        | 0.000165506 | 2.818290707 |
| Cxcl16        | 0.000496488 | 3.66198421  |
| Cyp2d9        | 2.74E-06    | 40.57140771 |
| Cyp4b1        | 0.000165296 | -5.40612    |
| Cyp4f15       | 0.00034517  | -5.0114     |
| Cyp4f16       | 0.000444694 | 1.576173303 |
| D10Jhu81e     | 0.000133682 | -2.2049     |
| D2Ertd391e    | 0.000301133 | -1.7553     |
| D430028G21Rik | 0.000398914 | -2.02196    |
| D5Wsu178e     | 0.000392762 | 1.733387646 |
| D830050J10Rik | 0.000302346 | -3.81764    |
| D9Ertd402e    | 0.000470214 | -1.60976    |
| Dapk1         | 0.000809121 | -2.30605    |
| Dazap2        | 0.000187877 | 1.59804144  |
| Dbi           | 0.000394125 | 1.636428201 |
| Dbnidd2       | 7.02E-05    | 3.815628816 |
| Dcakd         | 0.000921291 | 1.910230622 |
| Ddc           | 0.000328284 | 2.924712062 |
| Ddx3x         | 1.18E-05    | 2.555420686 |
| Dgcr6         | 0.000599602 | -3.23139    |
| Dhdh          | 0.000230559 | -1.81362    |
| Dhrs7b        | 2.62E-05    | 1.739460176 |
| Dhx32         | 0.000754135 | 2.765769728 |
| Dnase1l1      | 0.000395623 | 3.194469734 |
| Dnmt1         | 0.000993428 | 2.870651322 |
| Dpm1          | 0.000517809 | -2.11951    |
| Dpp7          | 0.000253701 | 2.233987892 |
| Dscr1l2       | 7.35E-05    | 2.969077062 |
| Dstn          | 0.000617183 | 1.713367349 |
| Dus4l         | 0.000961808 | -3.84641    |
| Dynll1        | 0.000231315 | 2.83318223  |

|          |             |             |
|----------|-------------|-------------|
| Dynlt3   | 0.000242743 | 2.439280217 |
| EG277333 | 0.000200067 | 4.443160865 |
| EG317677 | 0.000956628 | -2.47036    |
| EG381438 | 9.13E-05    | -2.99687    |
| EG622339 | 0.00024621  | 2.238879486 |
| Ecm1     | 0.000350632 | -10.3816    |
| Efha1    | 3.75E-05    | 4.147966252 |
| Egln3    | 0.000225964 | 4.698607803 |
| Ehd4     | 0.000162709 | 3.204727614 |
| Eif3k    | 0.000663226 | 1.65722051  |
| Elf3     | 7.09E-05    | 8.562816824 |
| Elmo1    | 0.000233906 | 3.55846559  |
| Emp1     | 8.57E-06    | 16.94162931 |
| Endod1   | 4.51E-05    | 6.592218545 |
| Eno1     | 0.000697302 | 1.925342904 |
| Enoph1   | 0.000723532 | 3.318896135 |
| Ephx1    | 5.41E-05    | 2.534423811 |
| Eps8l2   | 0.000389376 | 3.584152312 |
| Ercc3    | 6.04E-05    | 2.079871214 |
| Ermp1    | 2.96E-05    | 3.481991142 |
| Ets2     | 0.000287081 | 4.287245445 |
| Exdl1    | 0.000585075 | -2.01638    |
| Exosc8   | 9.49E-05    | 2.386925378 |
| F10      | 0.000993861 | -1.77978    |
| F2r      | 0.000302227 | 2.519500937 |
| F8a      | 0.000508237 | 1.672428182 |
| Fads3    | 0.000587402 | 5.782419133 |
| Fam102a  | 0.000478006 | 2.295194093 |
| Fam116b  | 0.000311995 | -3.90613    |
| Fam164a  | 0.000437238 | 5.556111167 |
| Fam178a  | 0.000828576 | -1.83739    |
| Fbp1     | 0.000493682 | -1.82312    |
| Fbxo25   | 0.000359539 | 4.230583736 |
| Fbxo6    | 4.09E-05    | 3.061071436 |
| Fen1     | 0.000548805 | 2.648529536 |
| Fkbp11   | 0.000777533 | 4.207921834 |
| Fkbp1a   | 0.000223919 | 4.080600011 |
| Foxa1    | 0.000845147 | 1.992309685 |
| Frk      | 7.74E-05    | 6.0673721   |
| Ftcd     | 0.00073156  | -3.47189    |
| Gadd45g  | 0.00053197  | -2.1684     |
| Gale     | 0.000980291 | 3.940389783 |
| Gbl      | 2.12E-05    | 1.671106239 |
| Gca      | 0.000304272 | 5.800497683 |
| Gcc2     | 0.000421878 | 1.769494968 |
| Gipc2    | 0.000645679 | 2.255142288 |
| Glrx3    | 4.53E-05    | 2.983925593 |

|           |             |             |
|-----------|-------------|-------------|
| Gm129     | 0.000795925 | -11.0169    |
| Gm1821    | 0.000481333 | 1.57622796  |
| Gmcl1     | 0.000939884 | 2.140951696 |
| Gnmt      | 0.000337738 | -5.64182    |
| Golm1     | 2.01E-05    | 11.24953033 |
| Gpc4      | 0.000946944 | 2.662236705 |
| Gphn      | 0.000801875 | -1.57661    |
| Gpld1     | 0.000477448 | -3.93183    |
| Gpn2      | 0.000587206 | 3.061858732 |
| Gpr108    | 2.44E-05    | -1.84214    |
| Gpr97     | 9.62E-05    | -3.07015    |
| Gpt1      | 0.000848719 | -1.99389    |
| Gpx7      | 2.67E-05    | 3.01716465  |
| Grcc10    | 0.000529421 | -2.23239    |
| Gspt2     | 0.000244598 | 5.536454787 |
| Gstm1     | 2.15E-05    | 2.187752959 |
| Gstm2     | 0.000387465 | 3.817070704 |
| Gstm3     | 7.67E-06    | 3.412456832 |
| Gstm6     | 0.00073373  | 2.898886827 |
| Gstp1     | 0.000123016 | 3.499170697 |
| Gstt3     | 0.000567799 | -2.02931    |
| Gtf3a     | 0.000449502 | -2.20429    |
| Gusb      | 0.000261823 | 2.619439911 |
| H1f0      | 0.000178981 | 4.110811022 |
| H3f3b     | 1.68E-05    | 2.145324266 |
| Hdac2     | 0.000665216 | 2.640368595 |
| Hgsnat    | 0.000820774 | -1.95185    |
| Hisppd1   | 0.000136832 | 3.329570918 |
| Hist1h1c  | 0.000252505 | 4.242537377 |
| Hist1h2ad | 0.000382946 | 4.179012165 |
| Hist1h2af | 0.000772917 | 3.772688002 |
| Hist1h2ah | 0.00072353  | 3.625579186 |
| Hist1h2ak | 0.000320981 | 3.378663738 |
| Hist1h2an | 0.000370576 | 5.373022056 |
| Hist1h2bc | 0.000355109 | 1.874069993 |
| Hist1h2bf | 0.000617277 | 1.644193285 |
| Hist2h3b  | 8.88E-06    | 2.556139207 |
| Hivep1    | 0.000344981 | -2.43185    |
| Hmox1     | 0.00073581  | -2.01394    |
| Hn1       | 2.99E-05    | 18.05458261 |
| Hnrnph3   | 0.000300824 | -2.18032    |
| Hnrpd1    | 0.00064229  | -2.80606    |
| Homez     | 0.000246921 | -2.57063    |
| Hs3st3a1  | 0.000387142 | -3.05834    |
| Hsd3b2    | 0.00010513  | -2.88721    |
| Hspa4     | 0.000151721 | 5.421758602 |
| Hspb8     | 0.000330635 | -1.86271    |

|              |             |             |
|--------------|-------------|-------------|
| Hspbap1      | 0.000609921 | 3.180145714 |
| ldh2         | 0.00034205  | 3.555138419 |
| lfngr1       | 0.000819516 | 2.382120754 |
| lgf1         | 0.000475692 | -2.42266    |
| ll10rb       | 0.00074752  | 3.16228532  |
| ll11ra1      | 0.000549017 | -1.98819    |
| ll15ra       | 0.000440019 | -3.3745     |
| ll18bp       | 5.89E-05    | -2.39483    |
| lmp3         | 2.53E-05    | -1.64608    |
| lnhbe        | 8.18E-05    | 2.650417838 |
| lnpp5f       | 0.000747565 | 1.89890604  |
| ltgb5        | 0.000715145 | 2.01243686  |
| Jun          | 0.000324382 | 4.013936387 |
| Kctd2        | 0.000152069 | 1.826423971 |
| Kctd3        | 0.000525661 | 4.24224941  |
| Kif22        | 0.000719255 | 5.952487247 |
| Klf1         | 3.70E-06    | -5.85257    |
| Klf6         | 0.000978568 | 4.832808974 |
| Klhl17       | 0.000171051 | -2.03846    |
| Klk1b4       | 0.000368072 | 17.3058885  |
| Klkb1        | 0.00041104  | -3.1198     |
| Kpna3        | 0.000138086 | 6.440767482 |
| Kpnb1        | 0.000189348 | 6.136512865 |
| LOC100040592 | 1.02E-05    | 2.084036696 |
| LOC100041103 | 0.000899097 | 2.761736691 |
| LOC100042179 | 5.76E-06    | -2.06938    |
| LOC100042777 | 0.000309897 | 1.791905961 |
| LOC100044221 | 0.000142608 | 6.219253565 |
| LOC100044475 | 0.000342086 | 3.929010636 |
| LOC100044576 | 0.000329683 | -3.56632    |
| LOC100044692 | 0.000174049 | 2.245117431 |
| LOC100044779 | 4.95E-05    | 5.262243926 |
| LOC100045343 | 0.000252049 | 2.870593639 |
| LOC100046841 | 0.000263354 | 2.780063608 |
| LOC100047619 | 0.000571271 | -2.52374    |
| LOC100047934 | 0.000587932 | 5.985586707 |
| LOC100047963 | 0.000731316 | 3.74259901  |
| LOC100048622 | 0.000216629 | 2.768794578 |
| LOC100048733 | 0.000686549 | 2.065723044 |
| LOC433801    | 0.000365105 | 4.451943496 |
| LOC677317    | 0.000768228 | 3.874782528 |
| Lasp1        | 0.00017458  | 3.278527286 |
| Lcat         | 0.000296518 | -2.23232    |
| Lcn2         | 8.44E-05    | 30.68416482 |
| Ldhd         | 0.000390251 | -2.10279    |
| Lgals1       | 0.000148194 | 11.15990469 |
| Lgals3       | 0.000356388 | 5.883321959 |

|          |             |             |
|----------|-------------|-------------|
| Litaf    | 3.13E-05    | 2.946801394 |
| Lmbr1l   | 0.000112095 | -6.67142    |
| Lmo2     | 0.000910454 | 3.709295123 |
| Lpin1    | 0.000621129 | -7.29604    |
| Lrp10    | 9.33E-05    | 2.421729696 |
| Lrrc8    | 0.000118669 | -3.03839    |
| Lsm3     | 0.000997965 | 1.859959899 |
| Luc7l2   | 0.00091527  | -2.9727     |
| Lxn      | 0.000413324 | 5.709489743 |
| Lyzs     | 0.000356056 | 5.888969371 |
| M6pr     | 9.72E-05    | 1.978540747 |
| Macrocl  | 0.000204703 | -8.40134    |
| Mad2l1bp | 6.61E-06    | 1.657085948 |
| Magee1   | 0.000348548 | 2.677662936 |
| Man2a1   | 0.000340286 | -1.98313    |
| Map3k1   | 0.000914341 | 3.988910828 |
| Mapt     | 4.29E-05    | 6.645843025 |
| Mast2    | 0.000382736 | 4.810606425 |
| Mcm4     | 6.97E-05    | 4.034779802 |
| Mdfic    | 0.000469666 | 8.213889687 |
| Memo1    | 0.000483859 | 2.402408174 |
| Mfge8    | 0.000138701 | 6.443174423 |
| Morf4l2  | 1.57E-05    | 1.561182752 |
| Mosc2    | 0.000373841 | -3.46736    |
| Mpv17l   | 0.000743798 | -4.48331    |
| Mrpl38   | 0.000271228 | 2.091140257 |
| Msh6     | 0.000335947 | 1.780518986 |
| Mthfd1   | 0.000444303 | -2.65232    |
| Mtss1    | 0.000613606 | -2.50479    |
| Mvp      | 0.000754939 | 2.958194791 |
| Myl6     | 0.000535519 | 2.534976336 |
| Mylc2b   | 0.000526653 | 2.522029931 |
| Myo5b    | 0.000359396 | 5.703172675 |
| Myo9b    | 0.00059238  | 2.10396977  |
| Myst4    | 0.000266237 | -1.59091    |
| Nans     | 0.0001372   | 2.949452287 |
| Ndufa8   | 0.00086706  | 1.518125661 |
| Nedd9    | 0.000452951 | 2.752849199 |
| Nfkbia   | 0.000183134 | -3.31748    |
| Nid1     | 3.51E-05    | 5.467976794 |
| Nme3     | 0.000305    | -2.21318    |
| Nola2    | 0.000883835 | 1.559245076 |
| Nosip    | 0.000552443 | -1.78531    |
| Notch4   | 0.000117491 | 1.733892571 |
| Npm3     | 0.00056616  | -2.13944    |
| Npm3-ps1 | 0.000222898 | -2.19788    |
| Nras     | 0.000518006 | 1.978846135 |



|                    |             |             |
|--------------------|-------------|-------------|
| Nsf                | 0.000795022 | 1.687760865 |
| Nt5c               | 0.000369165 | 2.821662467 |
| Nuak1              | 0.000259929 | 1.840417407 |
| Nudcd2             | 0.00012549  | 6.082022151 |
| Nudt18             | 0.000163261 | 3.402205309 |
| Nudt6              | 6.61E-05    | -1.67368    |
| OTTMUSG00000007855 | 0.000139147 | 4.882502576 |
| Ociad2             | 0.000121121 | 5.00931733  |
| Olfm1              | 0.000146526 | -3.604      |
| Oprs1              | 0.000858982 | 2.180977514 |
| Osgin1             | 0.000863502 | 2.151435222 |
| Ostb               | 0.000401852 | 5.368118743 |
| Otud6b             | 0.000157095 | 3.867664008 |
| Pabpc1             | 0.000187693 | 2.333515348 |
| Paip2              | 0.000932933 | 2.497982879 |
| Pank4              | 0.000686618 | -1.97918    |
| Pcbd2              | 0.000214857 | -1.70057    |
| Pcyt1a             | 0.000149216 | 2.247473839 |
| Pdcd10             | 0.000563596 | 1.543181299 |
| Pdlim7             | 0.000127949 | 4.728355951 |
| Pfkfb2             | 0.000297136 | -2.21262    |
| Pgd                | 0.000176253 | 2.337387922 |
| Pgp                | 0.000712627 | 1.84550877  |
| Pgs1               | 0.000473576 | 2.555923609 |
| Phf7               | 0.000450011 | -3.05359    |
| Pkia               | 0.000406051 | 4.420358403 |
| Pkp2               | 0.000715226 | 2.762980482 |
| Plekha1            | 9.19E-05    | 2.903499297 |
| Plrg1              | 9.74E-05    | 1.556773991 |
| Polg2              | 0.000327853 | -2.39213    |
| Polr2d             | 2.30E-05    | 1.800196221 |
| Polr2g             | 0.000163727 | 2.981434607 |
| Porcn              | 0.000446899 | -2.84005    |
| Ppap2c             | 0.000467484 | 2.544859511 |
| Ppargc1b           | 0.000650788 | -4.06857    |
| Ppp2ca             | 0.000818967 | 2.17238293  |
| Prc1               | 0.00091089  | 14.1734203  |
| Prei4              | 0.000207624 | -4.93782    |
| Prkx               | 5.37E-05    | 2.467089032 |
| Prnpip1            | 0.000356568 | -1.88623    |
| Proz               | 0.000217287 | -2.11675    |
| Prss8              | 5.07E-05    | 9.519548393 |
| Prune              | 0.00076403  | 3.892413686 |
| Pter               | 0.000906222 | 1.924409206 |
| Pthr1              | 6.87E-05    | -2.17331    |
| Ptpn1              | 0.000853257 | 2.436385963 |
| Ptpra              | 0.000472092 | 4.177475886 |

|           |             |             |
|-----------|-------------|-------------|
| Pygb      | 0.000811329 | 9.554566127 |
| Qdpr      | 0.000954264 | -2.5568     |
| R3hdm2    | 0.000529607 | 3.24403584  |
| Rab11fip5 | 6.35E-05    | 3.19144183  |
| Rab22a    | 0.000917748 | -2.11083    |
| Rab32     | 0.0002029   | 1.723980395 |
| Rabl4     | 0.000315183 | -1.96302    |
| Rassf1    | 0.00023916  | 2.073428393 |
| Rassf3    | 4.39E-05    | 10.5065193  |
| Rbl1      | 0.000473717 | 1.599511189 |
| Rcan3     | 0.000678234 | 3.959627637 |
| Reep5     | 1.24E-05    | 2.157455411 |
| Rer1      | 0.000282442 | 5.484560961 |
| Rgs16     | 0.000132459 | -37.5667    |
| Rhbdf1    | 0.000554047 | 3.937814041 |
| Rhod      | 0.000704864 | 2.206974481 |
| Ripk3     | 0.000229638 | -2.20839    |
| Rnpep     | 5.55E-05    | 2.942206243 |
| Rpa1      | 7.11E-06    | 1.970257    |
| Rpl22     | 9.73E-05    | -2.40103    |
| Rpl29     | 0.000470777 | 1.99179381  |
| Rpn2      | 0.000609074 | 1.532975843 |
| Rps6ka1   | 0.000265489 | 2.419661199 |
| Rras2     | 0.000290165 | 3.345466224 |
| Rxra      | 2.38E-05    | -3.49805    |
| S100a10   | 0.000491225 | 4.902369315 |
| S100a11   | 8.84E-06    | 37.99218881 |
| S100a6    | 6.62E-05    | 3.366844661 |
| Sae1      | 0.000462637 | 1.758322139 |
| Samd9l    | 8.71E-05    | 3.48959751  |
| Scamp5    | 9.41E-05    | 7.387215685 |
| Scand1    | 0.000332573 | -1.70981    |
| Scarf1    | 1.77E-05    | -3.33935    |
| Scnn1a    | 0.000368269 | -12.1626    |
| Scrn2     | 0.000890974 | -2.90727    |
| Sdcbp2    | 0.000335996 | 6.245901127 |
| Sdsl      | 0.000437023 | -5.17269    |
| Sec14l2   | 4.48E-05    | 1.924861121 |
| Selk      | 3.48E-05    | 2.996173886 |
| Sepp1     | 0.000213699 | 2.990591599 |
| Serhl     | 0.000899152 | -2.10126    |
| Serpina1e | 0.000252864 | -3.18087    |
| Serpinb6a | 0.000718011 | 5.530484028 |
| Setd3     | 0.000429861 | 1.834428181 |
| Setd4     | 3.27E-05    | -5.60408    |
| Setx      | 0.000268392 | 2.489382782 |
| Sfrs4     | 0.000513978 | -2.02196    |

|            |             |             |
|------------|-------------|-------------|
| Sfxn1      | 0.000103305 | -2.77312    |
| Shf        | 0.000513675 | -2.45001    |
| Siat9      | 0.000303523 | -3.78103    |
| Sirpa      | 0.000615193 | 2.850513377 |
| Sirt5      | 0.000745842 | 1.937736646 |
| Skap2      | 0.000290153 | 1.662433004 |
| Skp1a      | 6.26E-05    | 3.137274587 |
| Slc13a4    | 0.000406991 | -4.2232     |
| Slc15a4    | 0.000452663 | -2.61518    |
| Slc16a10   | 0.000155616 | -3.31692    |
| Slc25a15   | 0.000354138 | -2.16804    |
| Slc25a29   | 0.000594589 | -3.0886     |
| Slc25a32   | 0.000983359 | -3.74494    |
| Slc27a4    | 0.000524335 | 1.943241794 |
| Slc2a9     | 0.000450153 | -3.52971    |
| Slc30a6    | 0.000989177 | 1.828521275 |
| Slc41a2    | 8.28E-05    | 6.763886258 |
| Slc6a12    | 0.000350214 | -2.1262     |
| Slc6a8     | 0.000168314 | 8.725698928 |
| Smc3       | 0.000641986 | 1.854616604 |
| Smpd1      | 0.000543456 | -1.70962    |
| Snn        | 5.64E-05    | 4.118870606 |
| Sntg2      | 0.00023839  | -8.06536    |
| Snurf      | 5.61E-05    | 3.858679714 |
| Snx24      | 0.000964047 | 2.626112487 |
| Snx3       | 4.10E-05    | 6.144695285 |
| Snx7       | 0.000173473 | 7.003487737 |
| Sox5       | 0.000427435 | -2.30045    |
| Spon2      | 0.000384096 | 26.20984652 |
| Spr        | 0.000968401 | -1.86158    |
| Spred1     | 6.33E-06    | -3.01934    |
| Sqstm1     | 0.00018795  | 1.566391504 |
| Srd5a3     | 0.000124214 | 1.789312081 |
| Sri        | 5.18E-05    | 1.56694621  |
| Srpx2      | 0.000113079 | 2.150301795 |
| St3gal5    | 0.00056269  | -3.95692    |
| St6galnac2 | 6.99E-06    | 13.41921632 |
| Stab1      | 0.000788031 | -2.7226     |
| Suhw4      | 0.000460565 | -2.67898    |
| Taf13      | 5.33E-05    | 2.670669109 |
| Taf15      | 0.000670741 | -2.59458    |
| Taldo1     | 0.000303049 | 1.823326915 |
| Tatdn2     | 0.000334763 | -3.50777    |
| Tax1bp3    | 0.000117529 | 4.799639067 |
| Tbccl      | 0.000167893 | 2.577645115 |
| Tcf19      | 0.000692692 | 4.631859784 |
| Tcf7l2     | 0.00077312  | -3.07268    |
| Tef        | 0.000698027 | -2.22122    |

|           |             |             |
|-----------|-------------|-------------|
| Tgm2      | 2.43E-05    | 5.434073816 |
| Tha1      | 0.000980603 | -2.10274    |
| Thap4     | 0.00040323  | 4.102277995 |
| Tjp2      | 7.28E-05    | 5.145356316 |
| Tjp3      | 0.000219487 | 7.862191507 |
| Tk1       | 0.000927254 | -2.99868    |
| Tle1      | 1.58E-05    | -4.41396    |
| Tmed4     | 0.000547119 | 1.556895177 |
| Tmem128   | 0.00064767  | 1.674904405 |
| Tmem176b  | 6.70E-05    | 5.585468844 |
| Tmem183a  | 0.000762183 | -1.67544    |
| Tmem25    | 0.000314799 | -2.54413    |
| Tmem43    | 1.07E-05    | 4.969289789 |
| Tmem49    | 0.000936019 | 1.771319155 |
| Tmtc2     | 0.000174179 | -2.04521    |
| Tnfaip2   | 0.000100544 | 5.598947398 |
| Tnfrsf12a | 4.38E-05    | 8.75695083  |
| Tnip1     | 0.000361778 | 5.416061873 |
| Tomm22    | 6.11E-05    | 2.074525245 |
| Tomm70a   | 0.000899964 | 2.725813178 |
| Tor1aip1  | 0.000456213 | -2.33122    |
| Tpd52     | 3.88E-05    | 3.87688562  |
| Tpd52l1   | 0.000762997 | -4.10949    |
| Tpst1     | 0.000796411 | -3.54802    |
| Trak1     | 0.000490564 | -1.73361    |
| Trip12    | 0.000865076 | 1.558032828 |
| Trub1     | 6.38E-05    | -1.81177    |
| Tsc22d3   | 0.000359444 | -2.4433     |
| Tsn       | 6.66E-05    | 4.33805603  |
| Tspan17   | 0.000987852 | 6.442178229 |
| Tspan7    | 0.000638393 | -3.87975    |
| Tssc1     | 0.00093538  | 2.054214838 |
| Ttc39a    | 5.43E-05    | 4.964553091 |
| Ttyh2     | 0.000202643 | 1.769971026 |
| Tuba1a    | 0.000701046 | 6.139979247 |
| Tubb2b    | 3.75E-06    | 13.76545861 |
| Tubb5     | 0.000203772 | 2.815045857 |
| Tubb6     | 0.000303799 | 5.962353699 |
| Tuft1     | 0.000944436 | 3.283899697 |
| Tug1      | 0.000743273 | 2.680648931 |
| Tulp4     | 0.00082518  | 1.560468952 |
| Txndc1    | 0.000251891 | -2.2109     |
| Txndc12   | 0.000554342 | 2.535509815 |
| Uap1      | 3.99E-05    | 1.995438428 |
| Uap1l1    | 2.07E-06    | 6.951057603 |
| Ubd       | 0.000662556 | 56.55149013 |
| Ugt2b34   | 0.000674611 | 2.918336198 |
| Unc13b    | 6.23E-06    | 12.00412462 |
| Upp1      | 0.000713451 | 2.598165176 |

|                |             |             |
|----------------|-------------|-------------|
| Usp20          | 0.000442694 | 3.042982122 |
| Usp4           | 0.000416778 | 1.559836092 |
| Vapa           | 2.39E-05    | 3.012166139 |
| Vapb           | 0.000473318 | -2.66653    |
| Vcl            | 5.52E-06    | 3.236130753 |
| Vkorc1         | 0.000200267 | -1.60296    |
| Vps4b          | 0.000177371 | 1.908265844 |
| Wbp2           | 0.000104477 | 1.547542039 |
| Wdr1           | 0.000562881 | 1.794494491 |
| Wdr5b          | 0.000295595 | -1.52978    |
| Wdr9           | 0.000159386 | -2.97838    |
| Wfdc2          | 1.42E-05    | 26.93356029 |
| Wisp2          | 0.000291272 | 4.659701965 |
| Yipf4          | 0.000570703 | -1.5793     |
| Ywhab          | 0.000206598 | 1.636131008 |
| Ywhah          | 6.60E-05    | 2.914941993 |
| Ywhaz          | 0.000470916 | 2.445944624 |
| Zbed4          | 0.000334223 | 3.276593653 |
| Zbtb33         | 0.000217329 | 2.217766975 |
| Zbtb7a         | 0.000617417 | 2.415954967 |
| Zfand2a        | 0.00077164  | 1.979500295 |
| Zfp238         | 4.03E-06    | 4.683555568 |
| Zfp41          | 0.000591728 | 2.805206463 |
| Zfp715         | 0.000498159 | -2.9159     |
| Zkscan14       | 0.000934503 | -1.81936    |
| Zmym5          | 0.000785254 | -1.80859    |
| 1110001J03Rik  | 2.88E-05    | -2.10229    |
| 1110002B05Rik  | 0.000620396 | 3.971437422 |
| 1110002N22Rik  | 0.000802548 | -1.79246    |
| 1110006G06Rik  | 3.22E-05    | -2.645      |
| 1300001I01Rik  | 0.000248462 | -1.69349    |
| 1300017J02Rik  | 0.000940281 | -1.91107    |
| 1700047I17Rik1 | 0.000310588 | 4.713957084 |
| 1700067K01Rik  | 0.000766821 | -4.60563    |
| 1810014F10Rik  | 0.000395785 | -1.71586    |
| 1810049H13Rik  | 0.00011748  | -2.94805    |
| 2010001J22Rik  | 0.000127485 | -5.94897    |
| 2010106G01Rik  | 0.000443416 | 2.757875112 |
| 2310003H01Rik  | 0.000797794 | 2.109179571 |
| 2310045A20Rik  | 0.000971918 | 4.471851928 |
| 2610029G23Rik  | 5.68E-05    | 2.17331302  |
| 2610208M17Rik  | 0.000562878 | 2.133651959 |
| 2810004N23Rik  | 0.000674207 | -2.30894    |
| 2900064A13Rik  | 0.000307797 | 3.755600539 |
| 3930401K13Rik  | 0.000913373 | -1.59167    |
| 4732471D19Rik  | 9.72E-05    | -2.70146    |
| 4833418A01Rik  | 0.000451575 | 1.634008288 |
| 4833421E05Rik  | 0.000988682 | -2.14135    |
| 4833426J09Rik  | 9.10E-05    | -4.93879    |

|               |             |             |
|---------------|-------------|-------------|
| 4931406C07Rik | 6.22E-05    | 2.060925067 |
| 4933417E01Rik | 0.000222275 | -4.22372    |
| 4933426M11Rik | 0.000100614 | -1.88884    |
| 5830404H04Rik | 0.00035508  | -2.19754    |
| 5930434B04Rik | 0.000175461 | -2.67351    |
| 6720456H20Rik | 0.000367622 | -1.84826    |
| 9030025P20Rik | 0.000534069 | -2.72556    |
| 9130005N14Rik | 1.83E-05    | 4.033103715 |

#### Supplementary Table 4

Genes involved in cellular growth and proliferation and differently expressed in AKT-CAT+DDC tumors

in comparison to normal PBS treated liver tissue ( $p < 0.001$ , fold change  $> 1.5$ )

| Gene_ID | Entrez Gene Name                                                                        |
|---------|-----------------------------------------------------------------------------------------|
| Acat1   | acetyl-CoA acetyltransferase 1                                                          |
| Agps    | alkylglycerone phosphate synthase                                                       |
| Agrn    | agrin                                                                                   |
| Ahcy    | adenosylhomocysteinase                                                                  |
| Ahnak   | AHNAK nucleoprotein                                                                     |
| Akr1b8  | aldo-keto reductase family 1, member B10 (aldose reductase)                             |
| Aldh111 | aldehyde dehydrogenase 1 family, member L1                                              |
| Amd2    | adenosylmethionine decarboxylase 1                                                      |
| Ank3    | ankyrin 3, node of Ranvier (ankyrin G)                                                  |
| Anxa2   | annexin A2                                                                              |
| Appl1   | adaptor protein, phosphotyrosine interaction, PH domain and leucine zipper containing 1 |
| Arhgef2 | Rho/Rac guanine nucleotide exchange factor (GEF) 2                                      |
| Arl6ip5 | ADP-ribosylation factor-like 6 interacting protein 5                                    |
| Asns    | asparagine synthetase (glutamine-hydrolyzing)                                           |
| Atpif1  | ATPase inhibitory factor 1                                                              |
| Axin2   | axin 2                                                                                  |
| Bax     | BCL2-associated X protein                                                               |
| Bicc1   | BicC family RNA binding protein 1                                                       |
| Birc2   | baculoviral IAP repeat containing 2                                                     |
| Bmper   | BMP binding endothelial regulator                                                       |
| Calca   | calcitonin-related polypeptide beta                                                     |
| Casp2   | caspase 2, apoptosis-related cysteine peptidase                                         |
| Cbx7    | chromobox homolog 7                                                                     |
| Ccl2    | chemokine (C-C motif) ligand 2                                                          |
| Cd163   | CD163 molecule                                                                          |
| Cd276   | CD276 molecule                                                                          |
| Cd63    | CD63 molecule                                                                           |
| Cd9     | CD9 molecule                                                                            |
| Cisd1   | CDGSH iron sulfur domain 1                                                              |
| Clcn2   | chloride channel, voltage-sensitive 2                                                   |
| Clec11a | C-type lectin domain family 11, member A                                                |
| Clec2d  | C-type lectin domain family 2, member d                                                 |
| Cnot6l  | CCR4-NOT transcription complex, subunit 6-like                                          |
| Cnr2    | cannabinoid receptor 2 (macrophage)                                                     |
| Col4a1  | collagen, type IV, alpha 1                                                              |
| Col4a2  | collagen, type IV, alpha 2                                                              |
| Ctdspl  | CTD (carboxy-terminal domain, RNA polymerase II, polypeptide A) small phosphatase-like  |
| Ctnna1  | catenin (cadherin-associated protein), alpha 1, 102kDa                                  |
| Ctsc    | cathepsin C                                                                             |
| Cux2    | cut-like homeobox 2                                                                     |

Cxcl16 chemokine (C-X-C motif) ligand 16  
Cyp2b10 cytochrome P450, family 2, subfamily B, polypeptide 6  
Dab2ip DAB2 interacting protein  
Dact2 dishevelled-binding antagonist of beta-catenin 2  
Dcun1d3 DCN1, defective in cullin neddylation 1, domain containing 3  
Dusp8 dual specificity phosphatase 8  
Ecm1 extracellular matrix protein 1  
Egln2 egl-9 family hypoxia-inducible factor 2  
Egln3 egl-9 family hypoxia-inducible factor 3  
Ehd4 EH-domain containing 4  
Elf3 E74-like factor 3 (ets domain transcription factor, epithelial-specific)  
Emp1 epithelial membrane protein 1  
Entpd5 ectonucleoside triphosphate diphosphohydrolase 5  
Epha1 EPH receptor A1  
Ets2 v-ets avian erythroblastosis virus E26 oncogene homolog 2  
F2r coagulation factor II (thrombin) receptor  
F7 coagulation factor VII (serum prothrombin conversion accelerator)  
Fblim1 filamin binding LIM protein 1  
Fgf1 fibroblast growth factor 1 (acidic)  
Fkbp1a FK506 binding protein 1A, 12kDa  
Folr2 folate receptor 2 (fetal)  
Foxa1 forkhead box A1  
Foxo1 forkhead box O1  
Frk fyn-related Src family tyrosine kinase  
Gadd45g growth arrest and DNA-damage-inducible, gamma  
Gas6 growth arrest-specific 6  
Gas8 growth arrest-specific 8  
Gdf2 growth differentiation factor 2  
Ghr growth hormone receptor  
Gnmt glycine N-methyltransferase  
Golm1 golgi membrane protein 1  
Gpld1 glycosylphosphatidylinositol specific phospholipase D1  
Gpx4 glutathione peroxidase 4  
Gstm2 glutathione S-transferase mu 1  
Gstp1 glutathione S-transferase pi 1  
Guca2a guanylate cyclase activator 2A (guanylin)  
Hao1 hydroxyacid oxidase (glycolate oxidase) 1  
Hexim1 hexamethylene bis-acetamide inducible 1  
Hgfac HGF activator  
H2-M3 major histocompatibility complex, class I, G  
Hmga1 high mobility group AT-hook 1  
Hnrnpab heterogeneous nuclear ribonucleoprotein A/B  
Hrg histidine-rich glycoprotein  
Hsd11b1 hydroxysteroid (11-beta) dehydrogenase 1  
Htatip2 HIV-1 Tat interactive protein 2, 30kDa  
Icam1 intercellular adhesion molecule 1  
Ick intestinal cell (MAK-like) kinase  
Igf2bp3 insulin-like growth factor 2 mRNA binding protein 3  
Igfbp2 insulin-like growth factor binding protein 2, 36kDa



|              |                                                                                                                                            |
|--------------|--------------------------------------------------------------------------------------------------------------------------------------------|
| lhh          | indian hedgehog                                                                                                                            |
| Il11ra1      | interleukin 11 receptor, alpha                                                                                                             |
| Itpr3        | inositol 1,4,5-trisphosphate receptor, type 3                                                                                              |
| Jak3         | Janus kinase 3                                                                                                                             |
| Kat2a        | K(lysine) acetyltransferase 2A                                                                                                             |
| Kif3a        | kinesin family member 3A                                                                                                                   |
| Klf1         | Kruppel-like factor 1 (erythroid)                                                                                                          |
| Klf15        | Kruppel-like factor 15                                                                                                                     |
| Klf6         | Kruppel-like factor 6                                                                                                                      |
| Klk1b4       | kallikrein-related peptidase 3                                                                                                             |
| Kng1         | kininogen 1                                                                                                                                |
| Kras         | Kirsten rat sarcoma viral oncogene homolog                                                                                                 |
| Krt8         | keratin 8, type II                                                                                                                         |
| Lasp1        | LIM and SH3 protein 1                                                                                                                      |
| Lcn2         | lipocalin 2                                                                                                                                |
| Lgals1       | lectin, galactoside-binding, soluble, 1                                                                                                    |
| Lgals3       | lectin, galactoside-binding, soluble, 3                                                                                                    |
| Litaf        | lipopolysaccharide-induced TNF factor                                                                                                      |
| Lmo2         | LIM domain only 2 (rhombotin-like 1)                                                                                                       |
| Lrp1         | low density lipoprotein receptor-related protein 1                                                                                         |
| Lxn          | latexin                                                                                                                                    |
| Maged2       | melanoma antigen family D2                                                                                                                 |
| Map3k1       | mitogen-activated protein kinase kinase kinase 1, E3 ubiquitin protein ligase                                                              |
| Mapkapk<br>2 | mitogen-activated protein kinase-activated protein kinase 2                                                                                |
| Mapt         | microtubule-associated protein tau                                                                                                         |
| Mark2        | MAP/microtubule affinity-regulating kinase 2                                                                                               |
| Mcc          | mutated in colorectal cancers                                                                                                              |
| Mcl1         | myeloid cell leukemia 1                                                                                                                    |
| Mcm10        | minichromosome maintenance 10 replication initiation factor                                                                                |
| Mfge8        | milk fat globule-EGF factor 8 protein                                                                                                      |
| Mgat4b       | mannosyl (alpha-1,3-)-glycoprotein beta-1,4-N-acetylglucosaminyltransferase, isozyme B                                                     |
| Mgmt         | O-6-methylguanine-DNA methyltransferase                                                                                                    |
| Mif          | macrophage migration inhibitory factor (glycosylation-inhibiting factor)                                                                   |
| Mlxipl       | MLX interacting protein-like                                                                                                               |
| Mmp24        | matrix metalloproteinase 24 (membrane-inserted)                                                                                            |
| Mre11a       | MRE11 homolog A, double strand break repair nuclease                                                                                       |
| Msi2         | musashi RNA-binding protein 2                                                                                                              |
| Mtdh         | metadherin                                                                                                                                 |
| Mthfd1       | methylenetetrahydrofolate dehydrogenase (NADP+ dependent) 1,<br>methenyltetrahydrofolate cyclohydrolase, formyltetrahydrofolate synthetase |
| Mvp          | major vault protein                                                                                                                        |
| Ndrp2        | NDRG family member 2                                                                                                                       |
| Nedd9        | neural precursor cell expressed, developmentally down-regulated 9                                                                          |
| Nfkbia       | nuclear factor of kappa light polypeptide gene enhancer in B-cells inhibitor, alpha                                                        |
| Noc3l        | NOC3-like DNA replication regulator                                                                                                        |
| Nr1i3        | nuclear receptor subfamily 1, group I, member 3                                                                                            |
| Ntrk2        | neurotrophic tyrosine kinase, receptor, type 2                                                                                             |
| Pdgfa        | platelet-derived growth factor alpha polypeptide                                                                                           |

Pdgbf platelet-derived growth factor beta polypeptide  
 Pdzk1ip1 PDZK1 interacting protein 1  
 Pigr polymeric immunoglobulin receptor  
 Pim3 Pim-3 proto-oncogene, serine/threonine kinase  
 Pkp2 plakophilin 2  
 pleckstrin homology domain containing, family A (phosphoinositide binding specific)  
 Plekha1 member 1  
 Ppap2c phospholipid phosphatase 2  
 Ppia peptidylprolyl isomerase A (cyclophilin A)  
 Ppl periplakin  
 Prkx protein kinase, X-linked  
 Psm10 proteasome 26S subunit, non-ATPase 10  
 Ptpn14 protein tyrosine phosphatase, non-receptor type 14  
 Ptpns protein tyrosine phosphatase, receptor type, S  
 Rab22a RAB22A, member RAS oncogene family  
 Rab27a RAB27A, member RAS oncogene family  
 Rassf1 Ras association (RalGDS/AF-6) domain family member 1  
 Rassf3 Ras association (RalGDS/AF-6) domain family member 3  
 Rcl1 RNA terminal phosphate cyclase-like 1  
 Rhbdf1 rhomboid 5 homolog 1 (Drosophila)  
 Rhoc ras homolog family member C  
 Rhod ras homolog family member D  
 Rpa1 replication protein A1, 70kDa  
 Rras related RAS viral (r-ras) oncogene homolog  
 Rxra retinoid X receptor, alpha  
 Samhd1 SAM domain and HD domain 1  
 Scarf1 scavenger receptor class F, member 1  
 Sdc2 syndecan 2  
 Sdhb succinate dehydrogenase complex, subunit B, iron sulfur (lp)  
 sema domain, immunoglobulin domain (lg), short basic domain, secreted, (semaphorin)  
 Sema3b 3B  
 Serpina1c serpin peptidase inhibitor, clade A (alpha-1 antiproteinase, antitrypsin), member 1  
 Serpina3k serpin peptidase inhibitor, clade A (alpha-1 antiproteinase, antitrypsin), member 3  
 Sftpd surfactant protein D  
 Sirpa signal-regulatory protein alpha  
 Sirt3 sirtuin 3  
 Skap2 src kinase associated phosphoprotein 2  
 Slc29a1 solute carrier family 29 (equilibrative nucleoside transporter), member 1  
 Slc7a4 solute carrier family 7, member 4  
 Spp1 secreted phosphoprotein 1  
 Sqstm1 sequestosome 1  
 Sra1 steroid receptor RNA activator 1  
 Stim1 stromal interaction molecule 1  
 Stt3b STT3B, subunit of the oligosaccharyltransferase complex (catalytic)  
 Tax1bp3 Tax1 (human T-cell leukemia virus type I) binding protein 3  
 Tes testin LIM domain protein  
 Tfrc transferrin receptor  
 Tgfbr3 transforming growth factor, beta receptor III  
 Tgm2 transglutaminase 2

|           |                                                        |
|-----------|--------------------------------------------------------|
| Timd2     | T cell immunoglobulin and mucin domain containing 2    |
| Timd4     | T-cell immunoglobulin and mucin domain containing 4    |
| Tjp2      | tight junction protein 2                               |
| Tjp3      | tight junction protein 3                               |
| Tnfrsf12a | tumor necrosis factor receptor superfamily, member 12A |
| Tnfrsf19  | tumor necrosis factor receptor superfamily, member 19  |
| Tpd52     | tumor protein D52                                      |
| Tpd52l1   | tumor protein D52-like 1                               |
| Tpr       | translocated promoter region, nuclear basket protein   |
| Tsc22d3   | TSC22 domain family, member 3                          |
| Ttpa      | tocopherol (alpha) transfer protein                    |
| Txnrd2    | thioredoxin reductase 2                                |
| Usp22     | ubiquitin specific peptidase 22                        |
| Vcl       | vinculin                                               |
| Vegfa     | vascular endothelial growth factor A                   |
| Zap70     | zeta-chain (TCR) associated protein kinase 70kDa       |
| Zfp36     | ZFP36 ring finger protein                              |
| Zmat3     | zinc finger, matrin-type 3                             |

### Supplementary Table 5

Genes involved in cellular growth and proliferation and differently expressed in AKT-CAT+CCl<sub>4</sub> tumors

in comparison to normal PBS treated liver tissue ( $p < 0.001$ , fold change  $> 1.5$ )

| Gene_ID  | Entrez Gene Name                                                                                     |
|----------|------------------------------------------------------------------------------------------------------|
| Aatk     | apoptosis-associated tyrosine kinase                                                                 |
| Abcc3    | ATP-binding cassette, sub-family C (CFTR/MRP), member 3                                              |
| Abcg1    | ATP-binding cassette, sub-family G (WHITE), member 1                                                 |
| Abi1     | abl-interactor 1                                                                                     |
| Acsl4    | acyl-CoA synthetase long-chain family member 4                                                       |
| Adam9    | ADAM metallopeptidase domain 9                                                                       |
| Adra1b   | adrenoceptor alpha 1B                                                                                |
| Ahnak    | AHNAK nucleoprotein                                                                                  |
| Aldh1a1  | aldehyde dehydrogenase 1 family, member A1                                                           |
| Aldh1a7  | aldehyde dehydrogenase family 1, subfamily A7                                                        |
| Ambra1   | autophagy/beclin-1 regulator 1                                                                       |
| Anxa2    | annexin A2                                                                                           |
| App1     | adaptor protein, phosphotyrosine interaction, PH domain and leucine zipper containing 1              |
| Arg1     | arginase 1                                                                                           |
| Arhgap1  |                                                                                                      |
| 7        | Rho GTPase activating protein 17                                                                     |
| Arl3     | ADP-ribosylation factor-like 3                                                                       |
|          | ATP synthase, H <sup>+</sup> transporting, mitochondrial F1 complex, alpha subunit 1, cardiac muscle |
| Atp5a1   |                                                                                                      |
| Atpif1   | ATPase inhibitory factor 1                                                                           |
| Bcap31   | B-cell receptor-associated protein 31                                                                |
| C1galt1c |                                                                                                      |
| 1        | C1GALT1-specific chaperone 1                                                                         |
| Cbx7     | chromobox homolog 7                                                                                  |
| Cd163    | CD163 molecule                                                                                       |
| Cd63     | CD63 molecule                                                                                        |
| Cd9      | CD9 molecule                                                                                         |
| Cdt1     | chromatin licensing and DNA replication factor 1                                                     |
| Cisd1    | CDGSH iron sulfur domain 1                                                                           |
| Clec2d   | C-type lectin domain family 2, member d                                                              |
| Col18a1  | collagen, type XVIII, alpha 1                                                                        |
| Col4a1   | collagen, type IV, alpha 1                                                                           |
| Col4a2   | collagen, type IV, alpha 2                                                                           |
| Col6a1   | collagen, type VI, alpha 1                                                                           |
| Cstf2    | cleavage stimulation factor, 3' pre-RNA, subunit 2, 64kDa                                            |
| Ctsb     | cathepsin B                                                                                          |
| Cul1     | cullin 1                                                                                             |
| Cux2     | cut-like homeobox 2                                                                                  |
| Cx3cl1   | chemokine (C-X3-C motif) ligand 1                                                                    |
| Cxcl16   | chemokine (C-X-C motif) ligand 16                                                                    |
| Dapk1    | death-associated protein kinase 1                                                                    |
| Dbi      | diazepam binding inhibitor (GABA receptor modulator, acyl-CoA binding protein)                       |
| Ddx3x    | DEAD (Asp-Glu-Ala-Asp) box helicase 3, X-linked                                                      |
| Dnmt1    | DNA (cytosine-5-)-methyltransferase 1                                                                |

|         |                                                                               |
|---------|-------------------------------------------------------------------------------|
| Ecm1    | extracellular matrix protein 1                                                |
| Egln3   | egl-9 family hypoxia-inducible factor 3                                       |
| Ehd4    | EH-domain containing 4                                                        |
| Elf3    | E74-like factor 3 (ets domain transcription factor, epithelial-specific )     |
| Emp1    | epithelial membrane protein 1                                                 |
| Eno1    | enolase 1, (alpha)                                                            |
| Ercc3   | excision repair cross-complementation group 3                                 |
| Ets2    | v-ets avian erythroblastosis virus E26 oncogene homolog 2                     |
| F2r     | coagulation factor II (thrombin) receptor                                     |
| Fads3   | fatty acid desaturase 3                                                       |
| Fbp1    | fructose-1,6-bisphosphatase 1                                                 |
| Fen1    | flap structure-specific endonuclease 1                                        |
| Fkbp1a  | FK506 binding protein 1A, 12kDa                                               |
| Foxa1   | forkhead box A1                                                               |
| Frk     | fyn-related Src family tyrosine kinase                                        |
| Gadd45g | growth arrest and DNA-damage-inducible, gamma                                 |
| Gnmt    | glycine N-methyltransferase                                                   |
| Golm1   | golgi membrane protein 1                                                      |
| Gpc4    | glypican 4                                                                    |
| Gphn    | gephyrin                                                                      |
| Gpld1   | glycosylphosphatidylinositol specific phospholipase D1                        |
| Gstm2   | glutathione S-transferase mu 1                                                |
| Gstp1   | glutathione S-transferase pi 1                                                |
| H3f3b   | H3 histone, family 3A                                                         |
| Hdac2   | histone deacetylase 2                                                         |
| Hmox1   | heme oxygenase 1                                                              |
| Hspa4   | heat shock 70kDa protein 4                                                    |
| Hspb8   | heat shock 22kDa protein 8                                                    |
| Idh2    | isocitrate dehydrogenase 2 (NADP+), mitochondrial                             |
| Ifngr1  | interferon gamma receptor 1                                                   |
| Igf1    | insulin-like growth factor 1 (somatomedin C)                                  |
| Il11ra1 | interleukin 11 receptor, alpha                                                |
| Il15ra  | interleukin 15 receptor, alpha                                                |
| Inpp5f  | inositol polyphosphate-5-phosphatase F                                        |
| Itgb5   | integrin, beta 5                                                              |
| Jun     | jun proto-oncogene                                                            |
| Klf1    | Kruppel-like factor 1 (erythroid)                                             |
| Klf6    | Kruppel-like factor 6                                                         |
| Klk1b4  | kallikrein-related peptidase 3                                                |
| Lasp1   | LIM and SH3 protein 1                                                         |
| Lcat    | lecithin-cholesterol acyltransferase                                          |
| Lcn2    | lipocalin 2                                                                   |
| Lgals1  | lectin, galactoside-binding, soluble, 1                                       |
| Lgals3  | lectin, galactoside-binding, soluble, 3                                       |
| Litaf   | lipopolysaccharide-induced TNF factor                                         |
| Lmo2    | LIM domain only 2 (rhombotin-like 1)                                          |
| Lpin1   | lipin 1                                                                       |
| Lxn     | latexin                                                                       |
| Map3k1  | mitogen-activated protein kinase kinase kinase 1, E3 ubiquitin protein ligase |

Mapt microtubule-associated protein tau  
 Mcm4 minichromosome maintenance complex component 4  
 Memo1 mediator of cell motility 1  
 Mfge8 milk fat globule-EGF factor 8 protein  
 Mthfd1 methylenetetrahydrofolate dehydrogenase (NADP+ dependent) 1,  
 methenyltetrahydrofolate cyclohydrolase, formyltetrahydrofolate synthetase  
 Mtss1 metastasis suppressor 1  
 Mvp major vault protein  
 Nedd9 neural precursor cell expressed, developmentally down-regulated 9  
 Nfkbia nuclear factor of kappa light polypeptide gene enhancer in B-cells inhibitor, alpha  
 Nme3 NME/NM23 nucleoside diphosphate kinase 3  
 Nosip nitric oxide synthase interacting protein  
 Notch4 notch 4  
 Nras neuroblastoma RAS viral (v-ras) oncogene homolog  
 Nuak1 NUAK family, SNF1-like kinase, 1  
 Osgin1 oxidative stress induced growth inhibitor 1  
 Pcyt1a phosphate cytidyltransferase 1, choline, alpha  
 Pcd10 programmed cell death 10  
 Pkp2 plakophilin 2  
 pleckstrin homology domain containing, family A (phosphoinositide binding specific)  
 Plekha1 member 1  
 Ppap2c phospholipid phosphatase 2  
 Ppargc1b peroxisome proliferator-activated receptor gamma, coactivator 1 beta  
 Ppp2ca protein phosphatase 2, catalytic subunit, alpha isozyme  
 Prkx protein kinase, X-linked  
 Prune prune exopolyphosphatase  
 Ptpn1 protein tyrosine phosphatase, non-receptor type 1  
 Ptptra protein tyrosine phosphatase, receptor type, A  
 Rab22a RAB22A, member RAS oncogene family  
 Rassf1 Ras association (RalGDS/AF-6) domain family member 1  
 Rassf3 Ras association (RalGDS/AF-6) domain family member 3  
 Rbl1 retinoblastoma-like 1  
 Rgs16 regulator of G-protein signaling 16  
 Rhbdf1 rhomboid 5 homolog 1 (Drosophila)  
 Rhod ras homolog family member D  
 Ripk3 receptor-interacting serine-threonine kinase 3  
 Rpa1 replication protein A1, 70kDa  
 Rps6ka1 ribosomal protein S6 kinase, 90kDa, polypeptide 1  
 Rras2 related RAS viral (r-ras) oncogene homolog 2  
 Rxra retinoid X receptor, alpha  
 S100a10 S100 calcium binding protein A10  
 S100a6 S100 calcium binding protein A6  
 Sae1 SUMO1 activating enzyme subunit 1  
 Scarf1 scavenger receptor class F, member 1  
 Sec14l2 SEC14-like lipid binding 2  
 Selk selenoprotein K  
 Serpina1  
 e serpin peptidase inhibitor, clade A (alpha-1 antiproteinase, antitrypsin), member 1  
 Sirpa signal-regulatory protein alpha  
 Skap2 src kinase associated phosphoprotein 2

|           |                                                                              |
|-----------|------------------------------------------------------------------------------|
| Skp1a     | S-phase kinase-associated protein 1                                          |
| Slc30a6   | solute carrier family 30 (zinc transporter), member 6                        |
| Smc3      | structural maintenance of chromosomes 3                                      |
| Smpd1     | sphingomyelin phosphodiesterase 1, acid lysosomal                            |
| Snx3      | sorting nexin 3                                                              |
| Sox5      | SRY (sex determining region Y)-box 5                                         |
| Spred1    | sprouty-related, EVH1 domain containing 1                                    |
| Sqstm1    | sequestosome 1                                                               |
| Tax1bp3   | Tax1 (human T-cell leukemia virus type I) binding protein 3                  |
| Tcf19     | transcription factor 19                                                      |
| Tcf7l2    | transcription factor 7-like 2 (T-cell specific, HMG-box)                     |
| Tgm2      | transglutaminase 2                                                           |
| Tjp2      | tight junction protein 2                                                     |
| Tjp3      | tight junction protein 3                                                     |
| Tle1      | transducin-like enhancer of split 1 (E(sp1) homolog, Drosophila)             |
| Tnfrsf12a | tumor necrosis factor receptor superfamily, member 12A                       |
| Tpd52     | tumor protein D52                                                            |
| Tpd52l1   | tumor protein D52-like 1                                                     |
| Tsc22d3   | TSC22 domain family, member 3                                                |
| Tsn       | translin                                                                     |
| Tuba1a    | tubulin, alpha 1a                                                            |
| Tubb5     | tubulin, beta class I                                                        |
| Ubd       | ubiquitin D                                                                  |
| Upp1      | uridine phosphorylase 1                                                      |
| Usp4      | ubiquitin specific peptidase 4 (proto-oncogene)                              |
| Vapa      | VAMP (vesicle-associated membrane protein)-associated protein A, 33kDa       |
| Vcl       | vinculin                                                                     |
| Vkorc1    | vitamin K epoxide reductase complex, subunit 1                               |
| Wbp2      | WW domain binding protein 2                                                  |
| Wisp2     | WNT1 inducible signaling pathway protein 2                                   |
| Ywhaz     | tyrosine 3-monooxygenase/tryptophan 5-monooxygenase activation protein, zeta |
| Zbtb7a    | zinc finger and BTB domain containing 7A                                     |

**Supplementary Table 6:** Most significant diseases and function affected by DDC in AKT-CAT tumors in comparison to AKT-NRAS<sup>G12V</sup> tumors.

| <u>Pathway</u>                                 | <u>p-value</u>      |
|------------------------------------------------|---------------------|
| Cellular Growth and Proliferation              | 3.51 E-06 - 1.5E-02 |
| Cellular Assembly and Orgnization              | 1.21 E-05 - 1.5E-02 |
| Cardiovascular System Development and Function | 1.69E-05 - 1.5E-02  |
| Organismal survival                            | 3.21E-05 - 3.21E05  |
| Cancer                                         | 1.06E-04 - 1.5E-02  |
